# Supplementary material
Source: publisher figshare collection journal article supplement (https://gsapubs.figshare.com/ndownloader/files/23313764)
Supplement: Supplementary file 1 [file 23313764]

## Sheet: Sheet1
HORIZON	BP HISTORICAL NAME	2018 CHART NAME	PUBLISHED NAME (IF DIFFERENT)	Group	GoM Event type	ODP Event type	2018 CHART AGE (Ma)	CALIBRATED TO	COMMENTS
PS108							0.012	base Holocene	used base Holocene age as proxy: acutal 11,700 years (Ogg et al., 2016)
		Eccentricity		Max	CycStr		0.014
	Globorotalia inflata (GoM-local)	Globoconella inflata(GoM-local)		PF	HO	-	0.012
PS107							0.029	NN Event
	Gephyrocapsa omega (<4)	Gephyrocapsa omega (<4)		NN	HO	HO	0.029	Leg 161/Hole 975B	new Leg 161 age: de Kaenel
PS105							0.07	NN Event
	G. caribbeanica A1	Gephyrocapsa spp. (<3)		NN	Inc	HAO	0.07	Leg 161/Hole 977A	new Leg 161 age: de Kaenel used HCO G. aperta & HAO G. muellerae
		Gephyrocapsa spp. (<3) > Emiliania huxleyi		NN	-	Switch	0.07	Leg 161/Hole 977A	base NN21b; down-hole sense; de Kaenel et al. 1999
PS101							0.08	FO Event
		Globorotalia flexuosa		PF	HO	HO	0.08	Leg 165/Site 1002	Peterson et al. (2000)
PS100							0.088	NN Event
	G. caribbeanica A2	Gephyrocapsa caribbeanica (>3)		NN	Inc	Inc	0.088	Leg 161/Hole 977A	new Leg 161 age: de Kaenel
		Globorotalia flexuosa		PF	HRO	-	-
		Eccentricity		Max	CycStr		0.115
PS95							0.166	NN Event
	GO assemblage	Gephyrocapsa omega (<4)		NN	Inc	Inc	0.166	Leg 161/Hole 975B	new Leg 161 age: de Kaenel
		Ehrenbergina trigona (GoM-local)		BF			-
PS93							0.218	NN Event
		Umbilicosphaera rotula		NN	HO	HO	-
		Eccentricity		Max	CycStr		0.216
		Emiliania huxleyi		NN	LRO	LRO	0.218	Leg 161/Hole 976A	de Kaenel et al. 1999 (revised)
PS92							0.238	NN Event
	GS assemblage	Gephyrocapsa spp. (<3)		NN	Inc	HAO/Inc	0.238	Leg 161/Hole 975B	new Leg 161 age: de Kaenel used HAO Gephyrocapsa spp. (<1.5) & HAO G. oceanica (<4.0)
LPS92							0.275	NN Events
	lower GS assemblage	Gephyrocapsa caribbeanica		NN	Inc	HAO	0.275	Leg 161/Hole 977A	new Leg 161 age: de Kaenel used HAO G. caribbeanica
		Emiliania huxleyi		NN	LO	LO	0.275	Leg 161/Hole 977A	Base NN21a (CN15); new Leg 161 age: de Kaenel; de Kaenel et al. 1999 at 0.270 Ma (Site 976)
		Eccentricity		Max	CycStr		0.311
PS90							0.406	NN Event
		Eccentricity		Max	CycStr		0.403
	Pseudoemiliania lacunosa "1"	Pseudoemiliania lacunosa (delicate)		NN	HO	HO	0.406	Leg 161/Hole 975B	P. lacunosa with very narrow rim & delicate lacunae; age from de Kaenel et al. 1999
		Globorotalia truncatulinoides D/S	Truncorotalia truncatulinoides	PF	D/S	-	-		dextral to sinistral in downhole sense
LPS90							0.424	NN Event
		Peak		NN Abun	Inc	-	-		defined only as Abundance Peak in GoM
	lower Pseudoemiliania lacunosa "1"	Pseudoemiliania lacunosa		NN	-	HO	0.424	Leg 161/Hole 975B	Base NN20 (CN14b & CNPL11); new Leg 161 age: de Kaenel used HO elliptical forms (P. ovata of some)
PS85							0.439	NN Event
	Pseudoemiliania lacunosa "1.5"	Pseudoemiliania lacunosa (subell/subcir)		NN	HO	HO	0.439	Leg 161/Hole 975B	new Leg 161 age: de Kaenel used HO of subelliptical & subcircular forms
		Pseudoemiliania lacunosa (>7)		NN	-	HO	0.439	Leg 161/Hole 975B	Table 12 of de Kaenel et al. 1999 (Site 976)
		Globorotalia hessi		PF	HO		-
	Trimosina A	Trimosina denticulata		BF	HO		-		Picou et al. (1999), Part I, Data Sheet 139
		Pseudoemiliania lacunosa (circular)		NN	-	HO	0.458	Leg 161/Hole 977A	new Leg 161 age: de Kaenel used HO circular forms
		Eccentricity		Max	CycStr		0.493
LPS85							0.527	NN Event
	lower Pseudoemiliania lacunosa "1.5"	Pseudoemiliania lacunosa		NN	Inc	HAO	0.527	Leg 161/Hole 975D	new Leg 161 age: de Kaenel used increase circular & elliptical forms
PS83							0.584	NN Event
		Gephyrocapsa omega (>4)		NN	HO	HO	0.584	Leg 161/Hole 975B	new Leg 161 age: de Kaenel used HO G. omega (>4) & HFO G. omega (<4)
		Stilostomella antillea		BF	HO	-	-		Picou et al. (1999), Part I, Data Sheet 127
		Eccentricity		Max	CycStr		0.596
		Globorotalia tosaensis		PF		HO	0.61	Leg 138/Site 849	Mix et al. (1995); base Pt1b
		Eccentricity		Max	CycStr		0.692
PS82							0.742	NN Event
	Pseudoemiliania lacunosa "1.5"	Pseudoemiliania lacunosa		NN	Inc	HAO	0.742	Leg 161/Hole 975B	new Leg 161 age: de Kaenel; de Kaenel et al. 1999 at 0.739 Ma (Site 975)
PS80							0.781	NN Event
	P. lacunosa "2"	Crenalithus japonicus		NN	HO	HO	0.781	Leg 161/Hole 975B	de Kaenel et al. 1999 includes HO elliptical C. asanoi & HO C. japonicus
	2nd Trimosina A (local)	2nd Trimosina denticulata (local)		BF	2nd	-	-		Picou et al. (1999), Part I, Data Sheet 139
		Eccentricity		Max	CycStr		0.782
PS79							0.825	NN Event
	P. lacunosa "2 large"	Crenalithus asanoi		NN	HO	HO	0.825	Leg 161/Hole 975B	new Leg 161 age: de Kaenel used HO circular C. asanoi
		Eccentricity		Max	CycStr		0.867
PS70A							0.905	NN Event
	P. lacunosa "3"	Crenalithus doronicoides		NN	HRO	Inc	0.905	Leg 161/Hole 975B	new Leg 161 age: de Kaenel used HO Inc/HCO C. doronicoides & C. japonicus
		Sphaeroidinella dehiscens (1st acme)		PF	1st acme	-	-		1st acme in downhole sense
		Globigerina incisa		PF	HO	-	-
PS70B							0.962	NN Event
		Gephyrocapsa omega (>4)		NN	LO	LO	0.962	Leg 161/Site 976	de Kaenel et al. 1999; base NN19f (CN14a)
		Eccentricity		Max	CycStr		0.97
LPS70							0.99	NN Event
	P. lacunosa "3"	Crenalithus doronicoides		NN	Inc	Inc	0.99	Leg 161/Hole 975B	new Leg 161 age: de Kaenel used strong down-hole Inc C. doronicoides w/HAO Gephyrocapsa spp. (<3)
	Angulogerina magna	Trifarina reussi		BF	HO		-		Picou et al. (1999), Part I, Data Sheet 6
		Gephyrocapsa spp. (≥4µm)		NN		HO Abs.	1.06	Leg 154/926B	Raffi (2002); base CPL10
		Eccentricity		Max	CycStr		1.07
		Crenalithus asanoi (>6.5)		NN	LO	LO	1.122	Leg 161/Site 977	de Kaenel et al. 1999
		Eccentricity		Max	CycStr		1.169
PS68							1.235	NN Event
	Gephyrocapsa caribbeanica "B"	Gephyrocapsa caribbeanica (>6.5)		NN	HO	HO	1.235	Leg 161/Site 977	Base NN19e (~CNPL9); de Kaenel et al. 1999
		Hyalinea balthica (GoM-local)		BF	HO		-		Picou et al. (1999), Part I, Data Sheet 93
PS65							1.246	NN Event
	Helicsophaera cf. sellii	Helicsophaera sellii		NN	HO	HO	1.246	Leg 161/Site 979	Base NN19e; deKaenel et al. 1999; holotype has smaller central openings of 2 morphotypes
		Eccentricity		Max	CycStr		1.256
PS60							1.276	NN Event (proxy)
	Helicsophaera sellii	Helicsophaera sellii (lrg holes)		NN	HO	HRO	1.276	Leg 161/Site 977	de Kaenel et al. 1999: used age HRO H. sellii as proxy for HO large-holed morphotype
LPS60							1.357	NN Event
		Eccentricity		Max	CycStr		1.359
		Helicsophaera sellii		NN	Inc	HCO	1.357	Leg 161/Hole 975B	new Leg 161 age: de Kaenel used HCO H. sellii
		Sphaeroidinella dehiscens (2nd acme)		PF	2nd acme		-		2nd acme in downhole sense
	Angulogerina B	Trifarina holcki		BF	HO		-		Picou et al. (1999), Part I, Data Sheet 4
		Uvigerina hispida (local)		BF	HO		-		Picou et al. (1999), Part I, Data Sheet 144
		Gephyrocapsa oceanica (>5.5)		NN	LO	LO	1.566	Leg 161/Site 974	base NN 19d; de Kaenel et al. 1999
		Eccentricity		Max	CycStr		1.567
PS50							1.607	NN Peak/Event	Highest (youngest) Leg 154 sample analyzed for nannofossils: 1.595Ma
		Peak		NN Abun	Inc	Inc	1.607		this study
		Calcidiscus macintyrei		NN	HO	HO	1.607	Leg 154/Hole 926C	Boesiger et al. (2017); Base NN 19c (CN13b)
LPS50							1.634	NN Event
		Eccentricity		Max	CycStr		1.635
		Calcidiscus macintyrei		NN	Inc	Inc	1.634	Leg 154/Hole 926B	Boesiger et al. (2017)
		Gephyrocapsa caribbeanica (>4)		NN	LO	LO	1.68	Leg 154/Hole 926B	this study
		Gephyrocapsa oceanica (>4)		NN	LO	LO	1.698	Leg 154/Hole 926B	this study; base NN19b (CNPL8)
PS42							1.698	NN Peak/Event	Highest (youngest) Leg 154 sample analyzed for foraminifera: 1.720Ma
		Peak		NN Abun	Inc	Inc	1.698	Leg 154/Hole 926B	this study
	Dictyococcites productus	Dictyococcites productellus	Dictyococcites taganus	NN	Inc	Inc	1.698	Leg 154/Hole 926B	this study
	Cristellaria S	Lenticulina wallacei var.		BF	HO		-		Picou et al. (1999), Part I, Data Sheet 112
		Eccentricity		Max	CycStr		1.74
		Globorotalia crassula (inc)	Truncorotalia crassula	PF	Inc	Inc	1.81	Leg 154/Hole 926C	this study
P140							1.898	NN Event
		Eccentricity		Max	CycStr		1.843
		Peak		NN Abun	Inc	Inc	1.874	Leg 154/Hole 926C	this study
		Discoaster brouweri		NN	HO	HO	1.898	Leg 154/Hole 926C	revised age (this study) from 1.924Ma of Browning et al. (2017); base NN19A (CN13a & CNPL7)
		Globorotalia menardii S/D	Menardella menardii	PF	S/D		-		sinistral to dextral in downhole sense
		Lenticulina wallacei var.		BF	HRO		-		Picou et al. (1999), Part I, Data Sheet 112
		Discoaster asymmetricus		NN		HO	1.924	Leg 154/Hole 926C	revised age (this study) from 2.165Ma of Browning et al. (2017)
		Discoaster triradiatus		NN	HO	HO	1.924	Leg 154/Hole 926C	Browning et al. (2017)
		Globigerinoidesella fistulosa		PF		HO	1.945	Leg 154/Hole 926C	this study; base Pt1a
P135							2.024	Eccen./NN Peak/Event
		Eccentricity		Max	CycStr		2.024
		Peak		NN Abun	Inc	Inc	2.024	Leg 154/Hole 926B	this study
	Discoaster brouweri "A"	Discoaster dennei		NN	HO	HO	2.024	Leg 154/Hole 926B	Browning et al. (2017)
		Textularia sica (GoM-local)		BF	HO		-
		Discoaster triradiatus		NN	-	LCO	2.024	Leg 154/Hole 926B	this study
		Crenalithus doronicoides		NN	1st acme	INC	2.024	Leg 154/Hole 926B	this study
		Globorotalia truncatulinoides	Truncorotalia truncatulinoides	PF	LO	LO	2.024	Leg 154/Hole 926B	this study; base N22
		Globorotalia exilis	Menardella exilis	PF	HO	HO	2.286	Leg 154/Hole 926C	BP P135 historical marker; HO lower in Leg 154
P130							2.286	NN Peak/Event
		Peak		NN Abun	Inc	Inc	2.286	Leg 154/Hole 926C	this study
		Discoaster pentaradiatus		NN	HO	HO	2.286	Leg 154/Hole 926C	revised age (this study) from 2.327Ma of Browning et al. (2017); base NN18 (CN12d & CNPL6)
		Eccentricity		Max	CycStr		2.329
		Globorotalia miocenica	Menardella miocenica	PF	HO	HO	2.361	Leg 154/Hole 926A	this study; base PL6
		Bolivina imporcata (local)		BF	HO		-		Picou et al. (1999), Part I, Data Sheet 16
P120							2.511	NN Peak/Event
		Eccentricity		Max	CycStr		2.496
		Peak		NN Abun	Inc	Inc	2.511	Leg 154/Hole 926C	this study
		Discoaster surculus		NN	HO	HO	2.511	Leg 154/Hole 926C	Browning et al. (2017); base NN17 (CN12c)
	Lenticulina 1	Lenticulina lacrimata	Lenticulina senni lacrimata	BF	HO		-		Picou et al. (1999), Part I, Data Sheet 95
		Textularia crassisepta		BF	HO		-		Picou et al. (1999), Part I, Data Sheet 135
		Bolivina imporcata		BF	HRO		-		Picou et al. (1999), Part I, Data Sheet 16
		Eccentricity		Max	CycStr		2.603
LP120							2.634	NN Event
		Peak		NN Abun	Inc	Max	2.614	Leg 154/Hole 926A	this study
	Discoaster stellulus	Discoaster pliostellulus		NN	HO	HO	2.634	Leg 154/Hole 926A	revised age (this study) from 2.686Ma of Browning et al. (2017)
		Globorotalia pertenuis	Menardella pertenuis	PF	HO	HO	2.659	Leg 154/Hole 926A	this study
		Eccentricity		Max	CycStr		2.669
		Discoaster asymmetricus		NN	HO		-		GoM (this study)
		Ceratobulimina pacifica		BF	HO		-		Picou et al. (1999), Part I, Data Sheet 27
P110							2.729	NN Peak/Event
		Eccentricity		Max	CycStr		2.772
		Peak		NN Abun	Inc	Inc	2.729	Leg 154/Hole 926C	this study
		Discoaster tamalis		NN	HO	HO	2.729	Leg 154/Hole 926C	revised age (this study) from 2.752Ma of Browning et al. (2017); base CN12b (CNPL5)
	Saracenaria H	Saracenaria nuttalli		BF	HO		-		Picou et al. (1999), Part I, Data Sheet 116
P102							2.924	NN Peak/Event
		Peak		NN Abun	Inc	Inc	2.924	Leg 154/Hole 926C	this study
		Discoaster variabilis		NN	HO	HO	2.924	Leg 154/Hole 926C	revised age (this study) from 2.968 Ma of Browning et al. (2017)
		Eccentricity		Max	CycStr		2.954
		Globorotalia multicamerata	Menardella multicamerata	PF	HO	HO	2.968	Leg 154/Hole 926C	this study
P90							3.019	PF Events
	Globoquadrina altispira	Dentoglobigerina altispira		PF	HO	HO	3.019	Leg 154/Hole 926A	this study; base PL4/5
		Dentoglobigerina venezuelana	Globoquadrina venezuelana	PF	HO	HO	3.019	Leg 154/Hole 926A	this study
	Sphaeroidinellopsis subdehiscens (3 ch)	Sphaeroidinellopsis seminulina (3 ch.) (GoM)		PF	HO	HO	3.019	Leg 154/Hole 926A	this study; base PL4/5
		Eccentricity		Max	CycStr		3.048
		Peak		NN Abun	Inc	Inc	3.064	Leg 154/Hole 926A	this study
	Valvulineria H	Cibicorbis herricki	Valvulineria herricki	BF	HO		-		Picou et al. (1999), Part I, Data Sheet 148
	Valvulina H (lrg)	Alvarezina sinuata ("large")		BF	HO		-		A. sinuata "large"; Picou et al. (1999), Part I, Data Sheet 147
		Discoaster asymmetricus		NN	Inc	HO Acme	3.082	Leg 154/Hole 926C	Revised age (this study) from INC at 3.019 Ma in Browning et al. (2017): used 500 fov counts for more accurate top acme
		Discoaster tamalis		NN	Inc	HO Acme	3.082	Leg 154/Hole 926C	Revised age (this study) from INC at 3.019 Ma in Browning et al. (2017): used 500 fov counts for more accurate top acme
		Crenalithus doronicoides		NN	2nd acme	INC	3.082	Leg 154/Hole 926C	this study
P75							3.305	NN Peak/Event
		Peak		NN Abun	Inc	Inc	3.305	Leg 154/Hole 926A	this study
		Dictyococcites productellus		NN	Inc	Inc	3.305	Leg 154/Hole 926A	this study
		Eccentricity		Max	CycStr		3.338
		Eccentricity		Max	CycStr		3.435
P60							3.51	NN Event
		Sphenolithus spp.		NN	HO	HO	3.51	Leg 154/Hole 926C	age is HO S. abies Leg 154 from Bergen et al. (2017)
		Peak		NN Abun	Inc	Inc	3.523	Leg 154/Hole 926C	this study
		Eccentricity		Max	CycStr		3.539
		Sphaeroidinellopsis seminulina (4 ch.) (GoM)		PF	HO	HO	3.233	Leg 154/Hole 926C	BP P60 historical marker; HO higher in Leg 154
	Sphaeroidinellopsis subdehiscens (3 ch)	Sphaeroidinellopsis seminulina (3 ch.) (GoM)		PF	HRO	HRO	3.233	Leg 154/Hole 926C	BP P60 historical marker; HO higher in Leg 154
LP60							3.631	NN Peak/Event
		Eccentricity		Max	CycStr		3.632
		Peak		NN Abun	Inc	Inc	3.631	Leg 154/Hole 926C	this study
		Pontosphaera multipora (GoM)		NN	HO	Inc	3.631	Leg 154/Hole 926C	this study
		Textularia 25		BF	HO		-		BP Internal; Picou et al. (1999), Part I, Data Sheet 140
	Cibicidina A	Cibicides pseudocarstensi		BF	HO		-		BP Internal; Picou et al. (1999), Part I, Data Sheet 140
		Discorbis P		BF	HO		-		BP Internal; Picou et al. (1999), Part I, Data Sheet 140
LOCAL							3.666	NN Peak/Event
		Peak		NN Abun	Inc	Inc	3.666	Leg 154/Hole 926C	this study
		Sphenolithus abies (GoM)		NN	HO	HFO	3.666	Leg 154/Hole 926C	Bergen et al. (2017)
		Gephyrocapsa spp. (<3)		NN	Inc	Inc	3.686	Leg 154/Hole 926A	this study
P55A							3.727	NN Peak/Event
		Eccentricity		Max	CycStr		3.728
		Peak		NN Abun	Inc	Inc	3.727	Leg 154/Hole 926A	this study
		Reticulofenestra pseudoumbilicus		NN	HO	HO	3.727	Leg 154/Hole 926A	this study; base NN16 (CN12a & CNPL4)
		Globorotalia margaritae (GoM)	Hirsutella margaritae	PF	HO	HO	3.861	Leg 154/Hole 926C	BP P55A historical marker; HO lower in Leg 154; base PL3
P55B							3.819	NN Peak/Event
		Peak		NN Abun	Inc	Inc	3.819	Leg 154/Hole 926A	this study
		Reticulofenestra pseudoumbilicus		NN	HRO	HRO	3.819	Leg 154/Hole 926A	this study
		Eccentricity		Max	CycStr		3.832
P53							3.8612	NN Peak/Events
		Peak		NN Abun	Inc	Inc	3.861	Leg 154/Hole 926C	this study
		Sphenolithus spp.		NN	Inc	Pulse	3.861	Leg 154/Hole 926A	this study
		Reticulofenestra gelida (>8)		NN	HO	HO	3.861	Leg 154/Hole 926C	this study
P50							3.933	NN Peak/Events
		Eccentricity		Max	CycStr		3.932
		Peak		NN Abun	Inc	Inc	3.933	Leg 154/Hole 926C	this study
		Reticulofenestra pseudoumbilicus		NN	Inc	HCO	3.933	Leg 154/Hole 926C	this study
		Amaurolithus delicatus		NN	HO	HO	3.933	Leg 154/Hole 926C	Blair et al. (2017)
	Globigerina druryi (GoM)	Globoturborotalita nepenthes("unhooded") (GoM)	Globoturborotalita nepenthes	PF	HO	HO	4.315	Leg 154/Hole 926C	BP P50 historical marker; HO lower in Leg 154; base PL2
		Globorotalia margaritae (GoM)	Hirsutella margaritae	PF	HRO	Inc	3.908	Leg 154/Hole 926C	BP P50 historical marker; unsure if downhole INC in Leg 154 = HRO in GoM
		Buccella hannai (local)		BF	RE		-		Picou et al. (1999), Part I, Data Sheet 20
P45A							4.032	NN Event
		Eccentricity		Max	CycStr		4.027
		Peak		NN Abun	Inc	Inc	-
		Reticulofenestra pseudoumbilicus (>10)		NN	HO	HO	4.032	Leg 154/Hole 926C	this study
		Schyphosphaera globulata (GoM)		NN	HO	Inc	4.048	Leg 154/Hole 926B	this study; HRO 3.269Ma (Hole 926C)
	Globigerina nepenthes (R)	Globoturborotalita nepenthes ("hooded") (GoM)	Globoturborotalita nepenthes	PF	HO	HO	4.354	Leg 154/Hole 926C	BP P45A historical marker; HO lower in Leg 154
		Uvigerina rustica		BF	HO		-		Picou et al. (1999), Part I, Data Sheet 145
P45B							4.069	NN Peak/Event
		Peak		NN Abun	Inc	Inc	4.069	Leg 154/Hole 926B	this study
		Helicosphaera zeta		NN	HO	HO	4.069	Leg 154/Hole 926B	Boesiger et al. (2017)
		Discoaster toralus		NN	HO	HO	4.085	Leg 154/Hole 926B	Browning et al. (2017)
		Helicosphaera intermedia		NN	HO	HO	4.102	Leg 154/Hole 926B	Boesiger et al. (2017)
		Discoaster asymmetricus		NN	LFO	LCO	4.102	Leg 154/Hole 926B	this study; base CN11b (CNPL3)
		Eccentricity		Max	CycStr		4.12
LOCAL							4.143	NN Peak/Event
		Peak		NN Abun	Inc	Inc	4.143	Leg 154/Hole 926B	this study
		Sphenolithus moriformis		NN	HOAcme	Inc	4.143	Leg 154/Hole 926B	this study
		Reticulofenestra pseudoumbilicus		NN	HOAcme	Inc	4.177	Leg 154/Hole 926B	this study
LP45							4.244	NN Peak/Event
		Eccentricity		Max	CycStr		4.223
		Peak		NN Abun	Inc	Inc	4.244	Leg 154/Hole 926C	this study
		Reticulofenestra pseudoumbilicus (>10)		NN	Inc		-
		Discoaster pansulus (cf. pansus)		NN	HO	HO	4.244	Leg 154/Hole 926C	HO large variant (D. pansus) in Leg 154 from Browning et al. (2017)
		Eccentricity		Max	CycStr		4.327
P42							4.379	NN Peak/Event
		Peak		NN Abun	Inc	Inc	4.379	Leg 154/Hole 926B	this study
		Amaurolithus delicatus		NN	HRO	HRO	4.379	Leg 154/Hole 926B	Blair et al. (2017)
P40							4.395	PF Event
		Eccentricity		Max	CycStr		4.411
	Globigerina nepenthes (HCO)	Globoturborotalita nepenthes ("hooded")	Globoturborotalita nepenthes	PF	Inc	Inc	4.395	Leg 154/Hole 926B	this study; used Leg 154 Inc
	Buliminella 1 (regional)	Buliminella basispinata		BF	HRO		-		Picou et al. (1999), Part I, Data Sheet 22
	Siphotextularia jugosa	Siphotextularia jugosa		BF	HO		-		Picou et al. (1999), Part I, Data Sheet 123
		Peak		NN Abun	Inc	Max	4.445	Leg 154/Hole 926B	this study
		Amaurolithus tricorniculatus		NN	HO	HO	4.445	Leg 154/Hole 926B	Blair et al. (2017); base NN15 (CN11a); BP P40 historical nannofossil marker
		Reticulofenestra amplus		NN	2nd Acme	Inc	4.445	Leg 154/Hole 926B	this study
		Reticulofenestra pseudoumbilicus		NN	LCO	LCO	4.445	Leg 154/Hole 926B	this study
LP40							4.503	NN Peak/PF Event
		Eccentricity		Max	CycStr		4.494
		Peak		NN Abun	Inc	Inc	4.503	Leg 154/Hole 926B	this study
	Globorotalia plesiotumida (S) (local)	Globorotalia plesiotumida		PF	HO	HO	4.504	Leg 154/Hole 926B	this study
LOCAL							4.596	NN Peak/Events
		Eccentricity		Max	CycStr		4.601
		Peak		NN Abun	Inc	Inc	4.596	Leg 154/Hole 926C	this study
		Amaurolithus tricorniculatus		NN	HO	HRO	4.596	Leg 154/Hole 926C	Blair et al. (2017)
		Reticulofenestra pseudoumbilicus		NN	LFO	LFO	4.596	Leg 154/Hole 926C	this study
		Peak		PF Abun	Inc	Inc	4.597	Leg 154/Hole 926C
P32							4.666	NN Events
		Eccentricity		Max	CycStr		4.667
		Peak		NN Abun	Inc	Inc	4.644	Leg 154/Hole 926B	this study
		Ceratolithus armatus		NN	HO	HO	4.666	Leg 154/Hole 926B	Blair et al. (2017)
	Ceraolithus acutus (thin)	Ceratolithus cornulum		NN	HO	HO	4.666	Leg 154/Hole 926B	Blair et al. (2017)
P30							4.747	NN Event
		Peak		NN Abun	Inc	Inc	4.713	Leg 154/Hole 926B	this study
		Dictyococcites antarcticus		NN	HRO	HRO	4.747	Leg 154/Hole 926A	this study
		Eccentricity		Max	CycStr		4.77
		Globorotalia miocenica		PF		LO	4.79	Leg 154/Hole 926B	this study; base N20/21
P29							4.812	NN Peak/Event
		Peak		NN Abun	Inc	Inc	4.812	Leg 154/Hole 926B	this study
		Ceratolithus acutus		NN	HO	HO	4.812	Leg 154/Hole 926B	Blair et al. (2017); base CN10c (CNPL2)
		Reticulofenestra spp. (<3)		NN	flood	flood	4.818	Leg 154/Hole 926B	this study
		Eccentricity		Max	CycStr		4.864
		Globorotalia crassaformis (LO)	Truncorotalia crassaformis	PF	LO	LO	4.907	Leg 154/Hole 926B	this study
		Discoaster asymmetricus		NN	LRO	LRO	4.927	Leg 154/Hole 926B	this study; base NN14
P28							4.951	NN Peak/NN & PF Event
		Eccentricity		Max	CycStr		4.953
		Peak		NN Abun	Inc	Max	4.951	Leg 154/Hole 926B	this study
		Dictyococcites antarcticus		NN	Inc	HCO	4.951	Leg 154/Hole 926B	this study; also Hole 926B: weak Inc 4.907Ma, HFO 4.927Ma
	Sphaeroidinellopsis multiloba (5 ch)	Sphaeroidinellopsis kochi (5 ch.)		PF	HO	HO	4.952	Leg 154/Hole 926B	this study
P26							5.059	NN Peak/Event
		Eccentricity		Max	CycStr		5.05
		Peak		NN Abun	Inc	Inc	5.059	Leg 154/Hole 926B	this study
	Globigerinoides mitra (GoM)	Globigerinoides seigliei (GoM)		PF	HO	HO	-
	Sigmoilina P	Sigmoilopsis schlumbergeri var.		BF	Inc		-		Picou et al. (1999), Part I, Data Sheet 119
		Ceratolithus cristatus		NN	LO	LO	5.059	Leg 154/Hole 926B	Blair et al. (2017); base NN13
		Peak		PF Abun	Inc		5.077
		Dictyococcites antarcticus		NN	HCO	Max	5.107	Leg 154/Hole 926A	this study: max value in Leg 154
P25							5.147	NN Peak/Event
		Eccentricity		Max	CycStr		5.154
		Peak		NN Abun	Inc	Inc	5.147	Leg 154/Hole 926A	this study
		Ceratolithus atlanticus		NN	HO	HO	5.147	Leg 154/Hole 926A	Blair et al. (2017)
		Triquetrorhabdulus rugosus		NN	HO		5.232	Leg 154/Hole 926A	this study; extinction of genus
		1st Globorotalia menardii D/S	Menardella menardii	PF	1st D/S	1st D/S	5.233	Leg 154/Hole 926A	this study; 1st dextral to sinistral in downhole sense
		Bolivina M		BF	HO		-		BP Internal
P24							5.258	NN Peak/Event
		Eccentricity		Max	CycStr		5.254
		Peak		NN Abun	Inc	Inc	5.258	Leg 154/Hole 926A	this study
	Ceraolithus acutus (thick)	Ceratolithus apiculus		NN	HO	HRO	5.258	Leg 154/Hole 926A	this study; HO of 5.172Ma (Hole 926A) from Blair et al. (2017)
		Ceratolithus acutus		NN	LO	LO	5.34	Leg 154/Hole 926A	Blair et al. (2017); base NN12b (CN10b & CNPL1)
		Eccentricity		Max	CycStr		5.333		5.333Ma M/P Boundary
M122							5.365	NN Event
		Peak		NN Abun	Inc	Inc	5.362	Leg 154/Hole 926A	this study
	Discoaster sp. 1	Discoaster quintatus		NN	HO	HO	5.365	Leg 154/Hole 926A	Blair et al. (2017)
	Ceraolithus acutus (thick)	Ceratolithus apiculus		NN	LO	LO	5.372	Leg 154/Hole 926A	Blair et al. (2017)
M120							5.44	NN Peak/Event
		Eccentricity		Max	CycStr		5.43
		Peak		NN Abun	Inc	Inc	5.44	Leg 154/Hole 926A	this study
		Discoaster quinqueramus		NN	HO	HO	5.44	Leg 154/Hole 926A	Blair et al. (2017); base NN12a (CN10a & CNM20)
		2nd Globorotalia menardii D/S	Menardella menardii	PF	2nd D/S	2nd D/S	5.457	Leg 154/Hole 926C	this study; 2nd dextral to sinistral in downhole sense
		Sphaeroidinella dehiscens s. l.		PF		LO	5.48	Leg 154/Hole 925B	Wade et al. (2011); base N19
		Globorotalia tumida		PF		LO	5.63	Leg 154/Hole 925B	Wade et al. (2011); base N18/PL1
M110							5.677	NN Peak/Event
		Peak		NN Abun	Inc	Max	5.677		this study
		Discoaster berggrenii		NN	HO	HO	5.677	Leg 154/Hole 926C	Revised age (this study) from 5.772Ma of Blair et al. (2017)
	Globorotalia margaritae primitiva (S) (HRO)	Globorotalia primitiva	Hirsutella primitiva	PF	HRO	HO	5.759	Leg 154/Hole 926B	this study
		Eccentricity		Max	CycStr		5.804
M109							5.84	NN Peak
		Peak		NN Abun	Inc	Inc	5.84		Only Peak between M110 & M108
	Discoaster berggrenii VAR. (trans)	Discoaster quinqueramus (>14)		NN	HO	HO	-
M108							5.909	Eccentricity/NN Event
		Eccentricity		Max	CycStr		5.909
		Peak		NN Abun	Inc	Inc	5.96	Leg 154/Hole 926B	this study
	Discoaster berggrenii VAR.	Discoaster quinqueramus (>15)		NN	HO	HRO	5.909	Leg 154/Hole 926B	Revised age (this study) from 5.932 Ma of Blair et al. (2017)
		Textularia X		BF	HO		-		Picou et al. (1999), Part I, Data Sheet 134
		Amaurolithus amplificus		NN		HO	5.981	Leg 154/Hole 926B	Blair et al. (2017); base CNM19
	Globorotalia juanai (D)	Globorotalia juanai	Hirsutella juanai	PF	HO	HO	6.058	Leg 154/Hole 926C	this study
M105							6.096	NN Peak/Event
		Eccentricity		Max	CycStr		6.104
		Peak		NN Abun	Inc	Inc	6.096	Leg 154/Hole 926C	this study
	Discoaster preberggrenii	Discoaster vinsonii		NN	HO	HO	6.096	Leg 154/Hole 926C	Revised age (this study) from 6.120Ma of Blair et al. (2017)
		Textularia 6		BF	HO		-		Picou et al. (1999), Part I, Data Sheet 128
	Discoaster berggrenii compactus	Discoaster compactus		NN	HO	HO	6.233	Leg 154/Hole 926C	Blair et al. (2017)
M104							6.338	NN Peak/Events
		Eccentricity		Max	CycStr		6.301
		Peak		NN Abun	Inc	Inc	6.338	Leg 154/Hole 926B	this study
	Discoaster berggrenii compactus	Discoaster compactus		NN	HRO	HRO	6.338	Leg 154/Hole 926B	Revised age (this study from 6.325Ma of Blair et al. (2017)
		Reticulofenestra rotaria (>5)		NN	HO	HO	6.338	Leg 154/Hole 926B	this study
		Pulleniatina primalis		PF		LO	6.4		Wade et al. (2011); base N17b
M103							6.423	PF Peak/NN Peak
		Eccentricity		Max	CycStr		6.403
		Peak		PF Abun	Max		6.422
		Peak		NN Abun	Inc	Inc	6.423	Leg 154/Hole 926B	only Peak between M104 and M102 in Leg 154
	Discoaster berggrenii/quinqueramus (3ray)	Discoaster newellii		NN	HRO	HIO	6.445	Leg 154/Hole 926B	Revised age for HIO (this study); Blair et al. (2017) HRO at 6.423Ma not verified (this study)
M102							6.457	NN Peak/Events
		Peak		NN Abun	Inc	Inc	6.457	Leg 154/Hole 926B	this study
		Discoaster subsurculus		NN	HO	HO	6.457	Leg 154/Hole 926B	Browning et al. (2017)
		Discoaster pseudovariabilis		NN	HO	HRO	6.457	Leg 154/Hole 926B	Browning et al. (2017)
		Discoaster extensus		NN	HO	HO	6.457	Leg 154/Hole 926B	Browning et al. (2017)
		Eccentricity		Max	CycStr		6.491
	Globorotalia acostaensis D/S (HRO)	Neogloboquadrina acostaensis D/S		PF	HRO	Switch	6.497	Leg 154/Hole 926B	this study; abundance shift dextral to sinistral in downhole sense
		Textularia MR		BF	HO		-		Picou et al. (1999), Part I, Data Sheet 132
		Discoaster tristellifer		NN	HO	HO	6.515	Leg 154/Hole 926B	this study
LM102							6.55	NN Event
		Eccentricity		Max	CycStr		6.58
		Peak		NN Abun	Inc	Inc	6.573	Leg 154/Hole 926B	this study
		Coccolithus pelagicus		NN	Inc	HCO	6.55	Leg 154/Hole 926B	HCO Leg 154 from Boesiger et al. (2017)
M101							6.71	NN Events
		Eccentricity		Max	CycStr		6.675
		Peak		NN Abun	Inc	Inc	6.726	Leg 154/Hole 926C	this study
	Discoaster preberggrenii "extreme"	Discoaster abrachiatus		NN	HO	HO	6.71	Leg 154/Hole 926C	Blair et al. (2017)
		Discoaster compactus		NN	Inc	Inc	6.71	Leg 154/Hole 926C	Blair et al. (2017)
		Textularia M		BF	HO		-		BP Internal
M100							6.801	NN Peak/Events
		Eccentricity		Max	CycStr		6.775
		Peak		NN Abun	Inc	Inc	6.801	Leg 154/Hole 926C	this study
		Discoaster calcaris		NN	HO	HO	6.801	Leg 154/Hole 926C	Browning et al. (2017)
		Discoaster bergenii		NN	HO	HO	6.801	Leg 154/Hole 926C	Blair et al. (2017)
		Discoaster loeblichii		NN	HO	HO	6.821	Leg 154/Hole 926B	Browning et al. (2017), but not Hole 926C; HO 6.756Ma also from Browning et al. (2017)
	Robulus E	Lenticulina vaughni var.		BF	HO		-		Picou et al. (1999), Part I, Data Sheet 113
M98							6.832	NN Event
		Peak		NN Abun	Inc		-
		Discoaster icarus		NN	HRO	HRO	6.832	Leg 154/Hole 926B	Browning et al. (2017), but not Hole 926C; HO 6.756Ma also from Browning et al. (2017)
		Tritaxilina atlantica		BF	HO		-
M96							6.879	NN Peak/Event
		Eccentricity		Max	CycStr		6.865
		Peak		NN Abun	Inc	Inc	6.879	Leg 154/Hole 926B	this study
		Dictyococcites productellus		NN	Inc	Inc	6.879	Leg 154/Hole 926B	this study
		Amaurolithus amplificus		NN		LO	6.93	Leg 154/Hole 926B	Blair et al. (2017); base CNM18
M95							6.95	NN Peak/Event
		Peak		NN Abun	Inc		6.95	Leg 154/Hole 926B	this study
		Dictyococcites productellus		NN	Acme	Max	6.95	Leg 154/Hole 926B	this study
		Eccentricity		Max	CycStr		6.962
LOCAL							6.994	NN Peak
		Peak		NN Abun	Inc	Inc	6.994	Leg 154/Hole 926B	this study
		Eccentricity		Max	CycStr		7.059
	Discoaster berggrenii compactus	Discoaster compactus		NN	Acme	HFO	7.065	Leg 154/Hole 926B	Blair et al. (2017)
M94							7.086	NN Peak/Events
		Peak		NN Abun	Flood	Inc	7.086	Leg 154/Hole 926B	this study
		Reticulofenestra spp. (<3)		NN	Bloom	Bloom	7.086	Leg 154/Hole 926B	this study
		Discoaster neohamatus		NN	HO	HO	7.086	Leg 154/Hole 926B	Browning et al. (2017)
	Bigenerina A	Bigenerina floridana var.	Bigenerina floridana	BF	HO		-		Picou et al. (1999), Part I, Data Sheet 8
		Textularia 16		BF	HO		-		Picou et al. (1999), Part I, Data Sheet 129
		Eccentricity		Max	CycStr		7.159
LM94							7.201	NN Peak/Event
		Peak		NN Abun	Inc	Inc	7.201	Leg 154/Hole 926B	this study
	Discoaster hexaramus (long arms)	Discoaster prolixus		NN	HO	HO	7.201	Leg 154/Hole 926B	Blair et al. (2017)
		Reticulofenestra pseudoumbilicus		NN		Exit	7.236	Leg 154/Hole 926B	this study
M92							7.265	NN Peak/Event
		Eccentricity		Min	CycStr		7.259
		Peak		NN Abun	Inc	Inc	7.265	Leg 154/Hole 926B	this study
		Minylitha convallis		NN	HO	HO	7.265	Leg 154/Hole 926B	Browning et al. (2017)
	Discoaster preberggrenii "extreme"	Discoaster abrachiatus		NN	Inc	Inc	7.305	Leg 154/Hole 926B	Blair et al. (2017)
M90							7.332	NN Peak/Event
		Peak		NN Abun	Inc	Inc	7.332	Leg 154/Hole 926B	this study
	Discoaster loeblichii "thick"	Discoaster pachyloeblichii		NN	HO	HO	7.332	Leg 154/Hole 926B	Browning et al. (2017)
		Amaurolithus delicatus		NN		LO	7.332	Leg 154/Hole 926B	Blair et al. (2017)
LM90							7.374	NN Peak/Event
		Eccentricity		Max	CycStr		7.352
		Peak		NN Abun	Inc	Inc	7.374	Leg 154/Hole 926A	this study
	Discoaster loeblichii "stubby"	Discoaster breviloeblichii		NN	HO	HO	7.374	Leg 154/Hole 926A	Browning et al. (2017)
M89							7.438	NN Peak/Event
		Eccentricity		Max	CycStr		7.433
		Peak		NN Abun	Inc	Inc	7.438	Leg 154/Hole 926A	this study
	Discoaster hexaramus	Discoaster hexaramus		NN	HO	HO	7.438	Leg 154/Hole 926A	Blair et al. (2017)
LOCAL							7.542	NN Peak/Event
		Eccentricity		Max	CycStr		7.525
		Peak		NN Abun	Inc	Inc	7.542	Leg 154/Hole 926A	this study
	Discoaster preberggrenii "extreme"	Discoaster abrachiatus		NN	Dec	Dec	7.542	Leg 154/Hole 926A	Blair et al. (2017); downhole decrease weak in Leg 154 data (this study)
		Amaurolithus primus		NN		LO	7.559	Leg 154/Hole 926A	Blair et al. (2017); base NN11b (CN9b & CNM17)
M88							7.566	NN Peak/Event
		Peak		NN Abun	Inc	Inc	7.566	Leg 154/Hole 926B	this study
		Catinaster mexicanus	Muraster mexicanus	NN	HO	HO	7.566	Leg 154/Hole 926B	Blair et al. (2017)
		Cristellaria K		BF	HO		-		Picou et al. (1999), Part I, Data Sheet 37
	1st Miocene Nonion pompilioides (GoM)	1st Miocene Melonis pompilioides (GoM)	Melonis pompilioides	BF	RE		-		Picou et al. (1999), Part I, Data Sheet 101
	Amphistegina E	Amphistegina lessoni var.		BF	HO	Proxy	-		Picou et al. (1999), Part I, Data Sheet 3; used maximum Nannofossil Abundance at 7.581Ma in Leg 154 (Hole 926B)
		2nd Cristellaria K (local)		BF	RE	Proxy	-		Picou et al. (1999), Part I, Data Sheet 37; used top Nannofossil Abundance Peak at 7.630Ma in Leg 154 (Hole 926B)
M86							7.667	NN Peak/Event
		Eccentricity		Max	CycStr		7.689
		Peak		NN Abun	Inc	Inc	7.667	Leg 154/Hole 926B	this study
		Reticulofenestra pseudoumbilicus		NN	RE	RE	7.667	Leg 154/Hole 926B	used ≥8µm; downhole re-entry; LO Absent one sample higher at 7.646Ma (Hole 926B)
		Cyclammina 3		BF	HO		-		Picou et al. (1999), Part I, Data Sheet 39 & Data Sheet 7
		Uvigerina carapitana		BF	HO		-		Picou et al. (1999), Part I, Data Sheet 143
LM86							7.8	NN Peak
		Eccentricity		Max	CycStr		7.791
		Peak		NN Abun	Inc	Inc	7.8	Leg 154/Hole 926B	this study: strong nannofossil abundance peak only
	Cibicides H	Cibicides floridanus var.		BF	HO		-		BP Internal
M84							7.848	NN Peak/Events
		Peak		NN Abun	Inc	Inc	7.848	Leg 154/Hole 926B	this study
		Helicosphaera orientalis		NN	HO	HRO	7.848	Leg 154/Hole 926B	HRO Leg 154 from Boesiger et al. (2017)
		Minylitha convallis		NN	HRO	Inc	7.848	Leg 154/Hole 926B	Browning et al. (2017)
		Eccentricity		Max	CycStr		7.896
	Discoaster cf. bellus (asymmetric)	Discoaster astellaris		NN	HO	HO	7.912	Leg 154/Hole 926B	Blair et al. (2017)
LM84							8.025	NN Peak/Event
		Eccentricity		Max	CycStr		8
		Peak		NN Abun	Inc	Inc	8.025	Leg 154/Hole 926B	this study
	Discoaster cf. bellus (knob)	Discoaster gemmulatus		NN	HO	HO	8.025	Leg 154/Hole 926B	Blair et al. (2017)
	2nd Miocene Nonion pompilioides (GoM)	2nd Miocene Melonis pompilioides (GoM)	Melonis pompilioides	BF	2nd		-		Picou et al. (1999), Part I, Data Sheet 101
		Discoaster bellus		NN		HO	8.109	Leg 154/Hole 926A	Blair et al. (2017)
		Catinaster mexicanus		NN	LO	LO	8.204	Leg 154/Hole 926B	Blair et al. (2017)
M83							8.261	NN Peak
		Peak		NN Abun	Inc	Inc	8.261	Leg 154/Hole 926B	this study
		Eccentricity		Max	CycStr		8.283
		Discoaster quinqueramus		NN	LO	LO	8.317	Leg 154/Hole 926C	Blair et al. (2017); base NN11a
		Discoaster berggrenii		NN	LO	LO	8.317	Leg 154/Hole 926C	Blair et al. (2017); base CN9a (CNM16)
M82							8.343	PF Event
		Globorotalia lenguaensis (GoM)		PF	HO	HO	8.343	Leg 154/Hole 926C	this study
		Peak		NN Abun	Inc	Inc	8.344	Leg 154/Hole 926C	this study
		Discoaster bellus		NN	HO	HCO	8.344	Leg 154/Hole 926C	HCO Leg 154 from Blair et al. (2017)
		Eccentricity		Max	CycStr		8.39
M81A							8.449	NN Peak/Event
		Peak		NN Abun	Inc	Inc	8.449	Leg 154/Hole 926C	this study
	Discoaster prepentaradiatus "delicate"	Discoaster prepentaradiatus prepentaradiatus		NN	HO	HO	8.449	Leg 154/Hole 926C	Browning et al. (2017)
		Discoaster neohamatus		NN	HRO	Proxy	8.484	Leg 154/Hole 926C	this study: indirect age from LOCAL Peak w/HO acme M. convallis
	Globorotalia plesiotumida	Globorotalia plesiotumida		PF		LO	8.52	Leg 154/Hole 925B	Wade et al. (2011); base N17a/M13b
	Discoaster prepentaradiatus (4 ray)	Discoaster styzenii		NN		HO	8.522	Leg 154/Hole 926C	Browning et al. (2017)
	Discoaster prepentaradiatus	Discoaster prepentaradiatus plautus		NN		HO	8.539	Leg 154/Hole 926C	Browning et al. (2017)
		Eccentricity		Max	CycStr		8.667
M81B							8.67	NN Peak/Event
		Peak		NN Abun	Inc	Inc	8.67	Leg 154/Hole 926C	this study
		Reticulofenestra pseudoumbilicus		NN	Inc	Pulse	8.67	Leg 154/Hole 926C	used ≥8µm: increase in GoM tied to weak pulse in ODP Leg 154 (this study)
		Discoaster loeblichii		NN	LO	LO	8.738	Leg 154/Hole 926B	Browning et al. (2017); base CN8b
		Eccentricity		Max	CycStr		8.772
		Reticulofenestra amplus (>7)/R.pseudoumbilicus		NN		LO Dec.	8.785	Leg 154/Hole 926B	this study: includes all forms ≥7µm - to define base CNM15
M81C							8.806	NN Peak/Event
		Peak		NN Abun	Inc		8.806	Leg 154/Hole 926B	this study
	Discoaster prepentaradiatus	Discoaster prepentaradiatus plautus		NN	HO	Inc	8.806	Leg 154/Hole 926B	HIO Leg 154 from Browning et al. (2017)
		Globorotalia lenguaensis (GoM)		PF	HRO	HRO	8.971	Leg 154/Hole 926A	this study, but lower in Leg 154 than in GoM
M81D							8.902	NN Peak/Event
		Eccentricity		Max	CycStr		8.87
		Peak		NN Abun	Inc	Inc	8.902	Leg 154/Hole 926B	this study
	Discoaster prepentaradiatus (4 ray)	Discoaster styzenii		NN	HO	HRO	8.902	Leg 154/Hole 926B	Browning et al. (2017)
		Bolivina thalmanni		BF	HO		-		Picou et al. (1999), Part I, Data Sheet 18
	Robulus 64	Lenticulina wallacei var.		BF	HO		-		Picou et al. (1999), Part I, Data Sheet 112 & Data Sheet 7
		Textularia 23		BF	HO		-		BP Internal
		Textularia G		BF	HO		-		BP Internal
LM81A							8.929	NN Event
		Eccentricity		Max	CycStr		8.962
		Peak		NN Abun	Inc		-
		Discoaster prepentaradiatus		NN	HCO	HCO	8.929	Leg 154/Hole 926A	Browning et al. (2017)
		Globoquadrina dehiscens s.s. (GoM)		PF	HO	HO	8.931	Leg 154/Hole 926A	this study
LM81B							9.095	NN Event
		Eccentricity		Max	CycStr		9.057
		Peak		NN Abun	Inc	Inc	9.075	Leg 154/Hole 926A	this study
		Discoaster prepentaradiatus		NN	LCO	LCO	9.095	Leg 154/Hole 926A	Browning et al. (2017)
LM81C							9.161	NN Event
		Eccentricity		Max	CycStr		9.157
		Peak		NN Abun	Inc	Max	9.145	Leg 154/Hole 926A	this study
		Reticulofenestra gelida (>8)		NN	Inc	Inc	9.161	Leg 154/Hole 926A	this study: strong Inc in Leg 154
M80							9.202	NN Peak/Event
		Peak		NN Abun	Inc	Inc	9.202	Leg 154/Hole 926A	this study
		Discoaster bollii		NN	HO	HO	9.202	Leg 154/Hole 926A	Browning et al. (2017)
	Discorbis 12 (regional)	Discorbis dissona	Discorbis subaraucana dissona	BF	HRO		-		Picou et al. (1999), Part I, Data Sheet 42
		Bigenerina B		BF	HO		-		BP Internal
M79							9.229	NN Event
		Eccentricity		Max	CycStr		9.261
		Peak		NN Abun	Inc	Inc	9.256	Leg 154/Hole 926A	this study
	Discoaster cf. hamatus (small)	Discoaster hamatus (<15)		NN	HO	HO	9.229	Leg 154/Hole 926A	Browning et al. (2017)
	Robulus 15	Lenticulina 15		BF	HO		-		BP Internal
M78							9.326	NN Peak/Event
		Eccentricity		Max	CycStr		9.351
		Peak		NN Abun	Inc	Inc	9.326	Leg 154/Hole 926A	this study
		Minylitha cancellata		NN	HO	HO	9.326	Leg 154/Hole 926A	Browning et al. (2017)
	Discoaster bollii (5 ray)	Discoaster pentabollii		NN	HO	HO	9.377	Leg 154/Hole 926A	Browning et al. (2017)
		Discoaster hamatus (>15)		NN		HO	9.451	Leg 154/Hole 926A	Browning et al. (2017); base NN10 (CN8a & CNM14)
	Globorotalia acostaensis	Neogloboquadrina acostaensis		PF		LO	9.452	Leg 154/Hole 926A	this study; base N16/M13a
M77							9.542	NN Peak/Event
		Eccentricity		Max	CycStr		9.521
		Peak		NN Abun	Inc	Inc	9.542	Leg 154/Hole 926A	this study
	Discoaster bollii (variabilis type)	Discoaster caulifloris		NN	HO	HO	9.542	Leg 154/Hole 926A	Browning et al. (2017)
		Discoaster neorectus (>20)		NN		LRO	9.542	Leg 154/Hole 926A	this study: only Leg 154, but used LRO; LO is 9.689Ma (Browning et al., 2017)
M75							9.618	NN Events
		Eccentricity		Max	CycStr		9.585		9.599 is MAX Insolation
		Peak		NN Abun	Inc	Inc	9.63	Leg 154/Hole 926B	this study
		Discoaster hamatus (>15)		NN	HO	HRO	9.618	Leg 154/Hole 926B	HRO Leg 154 from Browning et al. (2017)
		Discoaster hamatus (>18)		NN		HO	9.618	Leg 154/Hole 926B	this study
		"Listerella-Schenckiella" fauna		BF	HO		-		Picou et al. (1999), Part I, Data Sheet 118
		Cibicides K		BF	HO		-		BP Internal
		Bolivina floridana		BF	HO		-		Picou et al. (1999), Part I, Data Sheet 14
	Cibicides crebbsi	Cibicidoides crebbsi		BF	HO		-		Picou et al. (1999), Part I, Data Sheet 30
LM75							9.727	NN Peak/Events
		Eccentricity		Max	CycStr		9.691
		Peak		NN Abun	Inc	Inc	9.727	Leg 154/Hole 926A	this study
		Discoaster bollii		NN	2nd Acme	Inc	9.727	Leg 154/Hole 926A	Browning et al. (2017)
		Discoaster hamatus		NN	Inc	Inc	9.727	Leg 154/Hole 926A	Browning et al. (2017)
LOCAL							9.781	NN Event
		Eccentricity		Max	CycStr		9.789
		Peak		NN Abun	Inc	Inc	9.76	Leg 154/Hole 926A
	Discoaster bollii (variabilis type)	Discoaster caulifloris		NN	Inc	Inc	9.781	Leg 154/Hole 926A	Browning et al. (2017)
M72							9.826	NN Event
		Peak		NN Abun	Inc	Max	9.803	Leg 154/Hole 926A	this study
		Catinaster coalitus		NN	HO	HRO	9.826	Leg 154/Hole 926A	HRO from de Kaenel et al. (2017) - proxy for 9.826Ma is a downhole Inc R. gelida (this study)
		Eccentricity		Min	CycStr		9.829		Minimum
	Textularia L	Spiroplectammina barrowi		BF	HO		-		Picou et al. (1999), Part I, Data Sheet 131
		Bolivina L		BF	HO	HO	-		Picou et al. (1999), Part I, Data Sheet 12
LM72							10.403	NN Events
		Eccentricity		Max	CycStr		10.375
		Peak		NN Abun	Inc	Max	10.379	Leg 154/Hole 926B
		Catinaster coalitus		NN	Inc	Inc	10.403	Leg 154/Hole 926A	de Kaenel et al. (2017)
		Catinaster coalitus (>10)		NN	HO	HO	10.403	Leg 154/Hole 926A	de Kaenel et al. (2017)
		Cibicides inflata		BF	HO		-		Picou et al. (1999), Part I, Data Sheet 32
		Gyroidina scalata		BF	HO		-		Picou et al. (1999), Part I, Data Sheet 90
LOCAL							10.451	NN Peak/Event
		Peak		NN Abun	Inc	Inc	10.451	Leg 154/Hole 926A	this study
	Discoaster cf. exilis	Discoaster gozoensis		NN	HO	HO	10.451	Leg 154/Hole 926A	Browning et al. (2017)
M71							10.49	NN Peak/Event
		Eccentricity		Max	CycStr		10.472
		Peak		NN Abun	Inc		10.49	Leg 154/Hole 926A	this study
		Discoaster exilis		NN	HO	HO	10.49	Leg 154/Hole 926A	Browning et al. (2017)
		Paragloborotalia mayeri	Globorotalia mayeri	PF	HO	HO	10.492	Leg 154/Hole 926A	this study; base N15/M12
M70							10.525	PF Event
		Paragloborotalia mayeri	Globorotalia mayeri	PF	HRO	Inc	10.525	Leg 154/Hole 926A	this study
	Bigenerina 2	Bigenerina directa		BF	HO		-		Picou et al. (1999), Part I, Data Sheet 11
		Cibicides carstensi		BF	HRO		-		Picou et al. (1999), Part I, Data Sheet 29
		Gyroidina scalata		BF	HRO		-		Picou et al. (1999), Part I, Data Sheet 90
		Eccentricity		Max	CycStr		10.546
		Peak		NN Abun	Inc	Inc	10.558	Leg 154/Hole 926A	this study
		Reticulofenestra gelida (>8)		NN	Dec	Dec	10.606	Leg 154/Hole 926A	this study
LOCAL							10.716	NN Peak/Event
		Peak		NN Abun	Inc	Inc	10.716	Leg 154/Hole 926A	this study
		Discoaster bollii		NN	LO	LO	10.716	Leg 154/Hole 926A	Browning et al. (2017)
		Catinaster coalitus		NN	LFO	LCO	10.732	Leg 154/Hole 926A	de Kaenel et al. (2017)
		Catinaster calyculus		NN		LRO	10.732	Leg 154/Hole 926A	de Kaenel et al. (2017); base CN7b
		Eccentricity		Max	CycStr		10.756
M68							10.8	NN Peak/Events
		Eccentricity		Min	CycStr		10.808		Minimum
		Peak		NN Abun	Inc	Inc	10.8	Leg 154/Hole 926A	this study
	Coccolithus cf. miopelagicus (small)	Coccolithus pliopelagicus (>11)		NN	HO	HO	10.8	Leg 154/Hole 926A	Boesiger et al. (2017)
		Discoaster neohamatus		NN	LO	LO	10.8	Leg 154/Hole 926A	Browning et al. (2017)
LM68							10.85	NN Peak/Event
		Eccentricity		Max	CycStr		10.859
		Peak		NN Abun	Inc	Inc	10.85	Leg 154/Hole 926A	this study
	Helicosphaera occulata/Helicosphaera cf. sellii	Helicosphaera bownii		NN	HO	HO	10.85	Leg 154/Hole 926A	Helicosphaera cf. sellii (Arco); HO from Boesiger et al. (2017)
		Eccentricity		Max	CycStr		10.946
		Discoaster hamatus (>15)		NN		LO	10.963	Leg 154/Hole 926A	Browning et al. (2017); base NN9 (CN7a & CNM13)
M67							10.996	NN Peak/Event
		Peak		NN Abun	Inc	Inc	10.996	Leg 154/Hole 926A	this study
		Coccolithus miopelagicus (>14)		NN	HO	HO	10.996	Leg 154/Hole 926A	Boesiger et al. (2017)
	Uvigerina 3	Uvigerina basirotunda		BF	HO		-		Picou et al. (1999), Part I, Data Sheet 141
LOCAL							11.017	NN Peak
		Peak		NN Abun	Inc	Inc	11.017	Leg 154/Hole 926A	this study
		Discoaster hamatus (GoM)		NN	LO	LO	11.017	Leg 154/Hole 926A	this study: LO ≥12µm in Leg 154 (Hole 926A)= LO D. hamatus ≥15µm in GoM
LM67A							11.037	NN Peak/Events
		Peak		NN Abun	Inc	Inc	11.037	Leg 154/Hole 926A	this study
	Discoaster kugleri (tapered)	Discoaster cuspidatus		NN	HO	HO	11.037	Leg 154/Hole 926A	de Kaenel et al. (2017)
	Discoaster aff. sanmiguelensis	Discoaster ulnatus		NN	HO	HO	11.037	Leg 154/Hole 926A	de Kaenel et al. (2017)
	Discoaster deflandrei (ornate)	Discoaster emblematicus		NN	HO	HO	11.037	Leg 154/Hole 926A	de Kaenel et al. (2017)
		Eccentricity		Max	CycStr		11.039
		Nodosaria angularis (local)		BF	HO		-		Picou et al. (1999), Part I, Data Sheet 100
		Eccentricity		Max	CycStr		11.144
	Globorotalia fohsi robusta (VR)	Globorotalia robusta	Fohsella robusta	PF	HO		11.145	Leg 154/Hole 926A	this study
LM67B							11.155	NN Peak/Event
		Peak		NN Abun	Inc	Inc	11.155	Leg 154/Hole 926A	this study
	Discoaster cf. kugleri (knob)	Discoaster hexapleuros (knb)		NN	HO	HO	11.155	Leg 154/Hole 926A	de Kaenel et al. (2017)
	Robulus 5 (local)	Lenticulina 5 (local)		BF	HO	Proxy	-	Leg 154/Hole 926A	"in" LM67B: used top Nannofossil Abundance Peak at 11.476Ma in Leg 154
	Globigerina nepenthes (R)	Globoturborotalita nepenthes ("hooded")	Globoturborotalita nepenthes	PF		LO	11.41	Leg 154/Hole 926A	this study; base N14/M11
M66							11.509	NN Peak/Events
		Peak		NN Abun	Inc	Inc	11.509	Leg 154/Hole 926A	this study
	Discoaster cf. sanmiguelensis	Discoaster patulus		NN	HO	HO	11.509	Leg 154/Hole 926A	de Kaenel et al. (2017)
	Discoaster kugleri	Discoaster kugleri		NN	HO	HRO	11.509	Leg 154/Hole 926A	de Kaenel et al. (2017)
	Discoaster cf. hamatus (small)	Discoaster hamatus (<10)		NN	LO	LO	11.509	Leg 154/Hole 926A	Browning et al. (2017)
		Eccentricity		Max	CycStr		11.519
	Globorotalia fohsi robusta (HRO)	Globorotalia robusta	Fohsella robusta	PF	HRO	HRO	11.529	Leg 154/Hole 926A	this study
		Peak		NN Abun		Inc	11.531	Leg 154/Hole 926A	this study
	Discoaster cf. kugleri	Discoaster hexapleuros		NN	HO	HO	11.531	Leg 154/Hole 926A	de Kaenel et al. (2017)
	Textularia W	Textularia stapperi		BF	HO	Proxy	-		Picou et al. (1999), Part I, Data Sheet 133; tied to nannofossil data at 11.531Ma
		Catinaster coalitus		NN	LO	LO	11.531	Leg 154/Hole 926A	de Kaenel et al. (2017) is on lateral views; base NN8 (CN6 & CNM12)
M65							11.575	NN Peak/Event
		Eccentricity		Min	CycStr		11.568		Minimum
		Peak		NN Abun	Inc	Inc	11.575	Leg 154/Hole 926A	this study
		Discoaster deflandrei		NN	HRO	HRO/Inc	11.575	Leg 154/Hole 926A	de Kaenel et al. (2017)
		Discoaster kugleri		NN	-	HCO	11.575	Leg 154/Hole 926A	de Kaenel et al. (2017); base CNM11
		Eccentricity		Max	CycStr		11.623
	Globorotalia fohsi lobata	Globorotalia lobata	Fohsella lobata	PF	HO	HO	11.657	Leg 154/Hole 926A	this study; used HO G. cf. lobata; HO G. lobata BP M65 historical marker
LM65							11.665	NN Events
		Peak		NN Abun	Inc	Inc	11.636	Leg 154/Hole 926A	this study
		Reticulofenestra haqii (<3)		NN	Inc	Bloom	11.665	Leg 154/Hole 926A	this study
		Dictyococcites productellus		NN	Inc	Bloom	11.665	Leg 154/Hole 926A	this study
		Discoaster kugleri		NN	-	LCO	11.76	Leg 154/Hole 926A	de Kaenel et al. (2017); base CNM10
		Eccentricity		Max	CycStr		11.796
M63							11.812	PF Event
	Globorotalia fohsi praefohsi (sensu Bolli & Saunders, 1985)	Globorotalia praefohsi	Fohsella praefohsi	PF	HO	HO	11.812	Leg 154/Hole 926A	this study; HO G. praefohsi sensu Bolli & Saunders (1985); base N13/M10
		Peak		NN Abun	Inc	Inc	11.826	Leg 154/Hole 926A	this study
		Discoaster sanmiguelensis		NN	HO	HO	11.849	Leg 154/Hole 926A	de Kaenel et al. (2017)
		Eccentricity		Max	CycStr		11.899
		Peak		NN Abun		Inc	11.91	Leg 154/Hole 926A	this study
		Discoaster kugleri		NN		LO	11.91	Leg 154/Hole 926A	de Kaenel et al. (2017); base NN7 (CN5b)
M62							11.925	PF Event
	Globorotalia fohsi fohsi (GoM) / G. fohsi praefohsi (after Blow & Banner, 1966)	Globorotalia fohsi	Fohsella fohsi	PF	HO	HO	11.925	Leg 154/Hole 926A	this study; HO G. fohsi (G. "praefohsi" after Blow & Banner, 1966)
		Peak		NN Abun	Inc	Inc	11.962	Leg 154/Hole 926A	this study
		Cyclicargolithus floridanus (<6)		NN	HO	HO	11.962	Leg 154/Hole 926A	this study
		Eccentricity		Max	CycStr		12.004
LOCAL							12.046	NN Peak/Event
		Peak		NN Abun	Inc	Inc	12.046	Leg 154/Hole 926A	this study
		Dictyococcites antarcticus		NN	Inc	Inc	12.046	Leg 154/Hole 926A	this study
	Globorotalia fohsi robusta	Globorotalia robusta	Fohsella robusta	PF		LO	12.048	Leg 154/Hole 926A	this study; base M9b
		Eccentricity		Max	CycStr		12.093
		Peak		NN Abun		Inc	12.125	Leg 154/Hole 926A	this study
		Umbilicosphaera jafari		NN	Bloom	Bloom	12.125	Leg 154/Hole 926A	this study
M60							12.173	Ecc/NN Peak/Event
		Eccentricity		Max	CycStr		12.173
		Peak		NN Abun	Inc	Inc	12.173	Leg 154/Hole 926A	this study
		Discoaster sanmiguelensis		NN	HRO	HRO	12.173	Leg 154/Hole 926A	de Kaenel et al. (2017)
		Bigenerina humblei		BF	HO		-		Picou et al. (1999), Part I, Data Sheet 9
		Gyroidina 6 (local)	Gyroidina vicksburgensis var. hannai	BF	HO	Proxy	-	Leg 154/Hole 926A	used top Nannofossil Abundance Peak at 12.270Ma in Leg 154
M58							12.321	NN Peak/Event
		Peak		NN Abun	Inc	Inc	12.321	Leg 154/Hole 926A	this study
		Calcidiscus spp.		NN	Inc	Bloom	12.321	Leg 154/Hole 926A	this study
		Eccentricity		Max	CycStr		12.365
		Calcidiscus premacintyrei		NN	HO	HO	12.368	Leg 154/Hole 926A	Boesiger et al. (2017)
		Calcidiscus premacintyrei (HRO)		NN		HRO	12.534	Leg 154/Hole 926A	this study; base CNM9
	Globorotalia fohsi peripheroacuta (local - VR)	Globorotalia peripheroacuta (local)	Fohsella peripheroacuta	PF	HO	HO	12.774	Leg 154/Hole 926B	this study
M57A							12.821	NN Peak/Event
		Eccentricity		Max	CycStr		12.836
		Peak		NN Abun	Inc	Inc	12.821	Leg 154/Hole 926A	this study
		Cyclicargolithus floridanus		NN	HRO	HRO	12.821	Leg 154/Hole 926A	this study
	Globorotalia fohsi peripheroacuta	Globorotalia peripheroacuta	Fohsella peripheroacuta	PF	HRO	Inc	12.825	Leg 154/Hole 926B	this study
	Globorotalia fohsi peripheroronda (VR)	Globorotalia peripheroronda	Fohsella peripheroronda	PF	HO	HO	12.857	Leg 154/Hole 926A	this study
	Cristellaria I	Lenticulina cristi		BF	HO		-		Picou et al. (1999), Part I, Data Sheet 36
M57B							12.93	NN Peak/Event
		Eccentricity		Max	CycStr		12.938
		Peak		NN Abun	Inc	Inc	12.93	Leg 154/Hole 926A	this study
		Helicosphaera rhomba		NN	HRO	HRO	12.93	Leg 154/Hole 926A	Boesiger et al. (2017)
M57C							12.968	NN Peak/Event
		Peak		NN Abun	Inc	Inc	12.968	Leg 154/Hole 926A	this study
	Discoster cf. kugleri (tapered)	Discoaster cuspidatus		NN	LRO	LRO	12.968	Leg 154/Hole 926A	de Kaenel et al. (2017)
LM57A							12.989	NN Peak/Event
		Peak		NN Abun	Inc	Inc	12.989	Leg 154/Hole 926A
	Cyclicargolithus sp. (rim=center)	Cyclicargolithus bukryi		NN	HO	HO	12.989	Leg 154/Hole 926A	Boesiger et al. (2017)
LM57B							12.999	NN Peak/Events
		Peak		NN Abun	Inc	Max	12.999	Leg 154/Hole 926A	this study
		Dictyococcites antarcticus		NN	Inc	Inc	12.999	Leg 154/Hole 926A	this study: weak increase in Leg 154
		Sphenolithus spp.		NN	Inc	Inc	12.999	Leg 154/Hole 926A	this study
		Coccolithus miopelagicus (>14)		NN	Inc	Inc	12.999	Leg 154/Hole 926A	strong increase in Leg 154
		Eccentricity		Max	CycStr		13.028
LM57C							13.067	NN Events
		Peak		NN Abun	Inc	Inc	13.08	Leg 154/Hole 926A	this study
		Discoaster musicus		NN	HO	HO	13.067	Leg 154/Hole 926A	de Kaenel et al. (2017)
	Reticulofenestra gartneri (small)	Reticulofenestra kahniae (<8)		NN	HO	HO	13.067	Leg 154/Hole 926A	Boesiger et al. (2017)
LOCAL							13.122	NN Peak/Event
		Eccentricity		Max	CycStr		13.128
		Peak		NN Abun	Inc	Inc	13.122	Leg 154/Hole 926A	this study
		Umbilicosphaera jafari		NN	Inc	Bloom	13.122	Leg 154/Hole 926A	this study
M56							13.215	PF Event
	Globorotalia fohsi peripheroronda (HRO)	Globorotalia peripheroronda	Fohsella peripheroronda	PF	HRO	Inc	13.215	Leg 154/Hole 926A	this study
		Peak		NN Abun	Inc	Inc	-
		Triquetrorhabdulus millowii		NN	HRO	Inc	13.217	Leg 154/Hole 926A	this study: strong downhole increase in Leg 154 data
		Eccentricity		Max	CycStr		13.231
M55							13.408	Ecc & NN Peak/Event
		Eccentricity		Max	CycStr		13.408
		Peak		NN Abun	Inc	Inc	13.408	Leg 154/Hole 926A	this study
		Sphenolithus heteromorphus		NN	HO	HO	13.408	Leg 154/Hole 926A	Bergen et al. (2017); base NN6 (CN5a & CNM8)
M54A							13.637	NN Event
		Peak		NN Abun	Inc	Inc	13.613	Leg 154/Hole 926A	this study
		Eccentricity		Max	CycStr		13.618
		Discoaster petaliformis		NN	HO	HO	13.637	Leg 154/Hole 926A	de Kaenel et al. (2017)
		Cibicides opima	Cibicides carstensi var. opima	BF	HO		-		Picou et al. (1999), Part I, Data Sheet 34
	Robulus 49	Lenticulina 49		BF	HO		-		Picou et al. (1999), Part I, Data Sheet 35
	Globorotalia fohsi praefohsi (sensu Bolli & Saunders, 1985)	Globorotalia praefohsi	Fohsella praefohsi	PF		LO	13.649	Leg 154/Hole 926A	this study; LO G. praefohsi sensu Bolli & Saunders (1985); base N12/M9a
M54B							13.706	NN Peak/Event
		Eccentricity		Max	CycStr		13.714
		Peak		NN Abun	Inc	Inc	13.706	Leg 154/Hole 926A	this study
		Cyclicargolithus bukryi		NN	HRO	HRO	13.706	Leg 154/Hole 926A	Boesiger et al. (2017)
M54C							13.782	NN Peak/Event
		Eccentricity		Max	CycStr		13.799
		Peak		NN Abun	Inc	Inc	13.782	Leg 154/Hole 926A	this study
		Reticulofenestra amplus		NN	Inc	Bloom	13.782	Leg 154/Hole 926A	this study
LM54A							13.856	NN Peak/Event
		Peak		NN Abun	Inc	Inc	13.856	Leg 154/Hole 926A	this study
		Discoaster druggii (<10)		NN	HO	HO	13.856	Leg 154/Hole 926A	de Kaenel et al. (2017)
LM54C							13.885	NN Event
		Eccentricity		Max	CycStr		13.899
		Peak		NN Abun	Inc	Inc	13.899	Leg 154/Hole 926A	this study
		Reticulofenestra pospichalii		NN	HO	HO	13.885	Leg 154/Hole 926A	Boesiger et al. (2017)
		Helicosphaera californiana		NN	HRO	HRO	13.988	Leg 154/Hole 926A	Boesiger et al. (2017); subtle event in Leg 154
M53							14.022	NN Peak/Event
		Eccentricity		Max	CycStr		14.002
		Peak		NN Abun	Inc	Inc	14.022	Leg 154/Hole 926A	this study
		Helicosphaera scissura		NN	HO	HO	14.022	Leg 154/Hole 926A	Historical BP marker; HO from Boesiger et al. (2017)
	Robulus 2	Lenticulina chambersi (local)		BF	HO		-		Picou et al. (1999), Part I, Data Sheet 109
		Cyclicargolithus bukryi		NN	Inc	Inc	14.042	Leg 154/Hole 926A	Boesiger et al. (2017)
	Globorotalia fohsi fohsi (GoM) / G. fohsi praefohsi (after Blow & Banner, 1966)	Globorotalia fohsi	Fohsella fohsi	PF		LO	14.054	Leg 154/Hole 925C	this study; LO G. fohsi (G. "praefohsi" after Blow & Banner, 1966); base N11/M8
LOCAL							14.091	NN Event
		Eccentricity		Max	CycStr		14.103
		Peak		NN Abun	Inc	Max	14.08	Leg 154/Hole 926A	this study
		Discoaster arneyi		NN	HO	HO	14.091	Leg 154/Hole 926A	de Kaenel et al. (2017)
M51							14.189	NN Peak/Event
		Eccentricity		Min	CycStr		14.187		Minimum
		Peak		NN Abun	Inc	Inc	14.189	Leg 154/Hole 926A	this study
		Discoaster premicros		NN	HO	HO	14.189	Leg 154/Hole 926A	de Kaenel et al. (2017)
	Robulus 53	Lenticulina 53		BF	HO		-		Picou et al. (1999), Part I, Data Sheet 110
	Praeorbulina glomerosa circularis	Praeorbulina circularis		PF	HO		-
	Praeorbulina glomerosa curva	Praeorbulina curva		PF	HO		-		includes P. transitoria
	Praeorbulina glomerosa glomerosa	Praeorbulina glomerosa		PF	HO		-
		Eccentricity		Max	CycStr		14.278
		Peak		NN Abun	Inc	Inc	14.28	Leg 154/Hole 926A	this study
		Helicosphaera perch-nielseniae		NN	HRO	HRO	14.28	Leg 154/Hole 926A	Boesiger et al. (2017)
	Globigerinoides sicanus	Trilobatus sicanus	Praeorbulina sicana	PF	HO	HO	14.298	Leg 154/Hole 925C	this study
		Globigerinatella insueta (local)		PF	HO		-
M50							14.32	NN Peak/Event
		Eccentricity		Max	CycStr		14.336
		Peak		NN Abun	Inc	Inc	14.32	Leg 154/Hole 926A	this study
		Discoaster deflandrei		NN	Inc	Inc	14.32	Leg 154/Hole 926A	de Kaenel et al. (2017); historical BP marker
	Amphistegina B	Amphistegina chipolensis		BF	HO		-		Picou et al. (1999), Part I, Data Sheet 2
	Globigerinoides bisphericus	Trilobatus bisphericus		PF	HO	HO	14.337	Leg 154/Hole 925A	this study
LOCAL							14.378	NN Peak/Event
		Peak		NN Abun	Inc	Inc	14.378	Leg 154/Hole 925A	this study
		Cyclicargolithus bukryi		NN	HO Acme	HO Acme	14.378	Leg 154/Hole 925A	Boesiger et al. (2017)
		Discoaster premicros		NN	Inc	Inc	14.397	Leg 154/Hole 925A	de Kaenel et al. (2017); weak increase in Leg 154
		Eccentricity		Max	CycStr		14.439
LOCAL							14.539	NN Peak/Event
		Eccentricity		Max	CycStr		14.543
		Peak		NN Abun	Inc	Inc	14.539	Leg 154/Hole 925C	this study
		Cyclicargolithus bukryi		NN	LO Acme	LO Acme	14.539	Leg 154/Hole 925C	Boesiger et al. (2017)
		Globorotalia peripheroacuta		PF		LO	14.539	Leg 154/Hole 925C	this study; base N10/M7
LM50							14.617	NN Peak/Event
		Eccentricity		Max	CycStr		14.629
		Peak		NN Abun	Inc	Inc	14.617	Leg 154/Hole 925C	this study
		Discoaster petaliformis		NN	HO Acme	HO Acme	14.617	Leg 154/Hole 925C	de Kaenel et al. (2017)
		Globigerinatella insueta		PF	HRO	HRO	14.697	Leg 154/Hole 925C	this study
M48A							14.897	NN Peak/Event
		Peak		NN Abun	Inc	Inc	14.897	Leg 154/Hole 925D	this study
		Helicosphaera ampliaperta		NN	HO	HO	14.897	Leg 154/Hole 925D	Boesiger et al. (2017); base NN5 (CN4)
		Eccentricity		Max	CycStr		14.93
M48B							15.098	NN Peak/Event
		Eccentricity		Max	CycStr		15.101
		Peak		NN Abun	Inc	Inc	15.098	Leg 154/Hole 925D	this study
	Discoaster calculosus s.l. (Amoco)	Discoaster salomonii		NN	HO	HO	15.098	Leg 154/Hole 925D	de Kaenel et al. (2017)
		Orbulina suturalis		PF		LO	15.1		Berggren et al. (1995b); base N9/M6
M48C							15.379	NN Event
		Eccentricity		Max	CycStr		15.397
		Peak		NN Abun	Inc	Inc	15.398	Leg 154/Hole 925C	this study
	Discoaster deflandrei (5ray)	Discoaster leroyi		NN	HRO	HRO	15.379	Leg 154/Hole 925C	de Kaenel et al. (2017)
		Globigerinatella insueta		PF	Inc	Inc	15.498	Leg 154/Hole 925C	this study
M48D							15.657	NN Event
		Peak		NN Abun	Inc	Inc	15.637	Leg 154/Hole 925D	this study
	Reticulofenestra lockeri/Dictyococcites excavatus	Dictyococcites albitectus		NN	HO	HO	15.657	Leg 154/Hole 925D	Boesiger et al. (2017)
		Eccentricity		Max	CycStr		15.692
		Discoaster petaliformis		NN	LO	LO	15.778	Leg 154/Hole 925D	de Kaenel et al. (2017); believed equivalent to LO Discoaster signus (base CNM7)
M46							15.818	NN Event
		Eccentricity		Max	CycStr		15.792
		Peak		NN Abun	Inc	Inc	15.797	Leg 154/Hole 925C	this study
		Reticulofenestra amplus		NN	Inc	Inc	15.818	Leg 154/Hole 925C	this study
		Globigerinoides diminutus		PF		HO	15.857	Leg 154/Hole 925C	this study
M44							16.018	NN Peak/Events
		Eccentricity		Max	CycStr		15.981
		Peak		NN Abun	Inc	Inc	16.018	Leg 154/Hole 925C	this study
	Reticulofenestra lockeri (cycle perfs);/Reticulofenestra daviesii	Dictyococcites onustus		NN	HO	HO	16.018	Leg 154/Hole 925C	Boesiger et al. (2017)
		Coronocyclus nitescens (>9)		NN	HO	HRO	16.018	Leg 154/Hole 925C	Boesiger et al. (2017)
	Robulus L	Lenticulina macomberi		BF	HO		-		Picou et al. (1999), Part I, Data Sheet 114
	Discorbis 4	Discorbis crosbiei		BF	HO		-		Picou et al. (1999), Part I, Data Sheet 41
	Robulus 54A	Lenticulina mayeri var. ("non-beaded keel")		BF	HO		-		Picou et al. (1999), Part I, Data Sheet 111
		Globigerinoides diminutus		PF	HRO	HRO	16.058	Leg 154/Hole 925C	this study
		Praeorbuliona glomerosa s.s.		PF		LO	16.258	Leg 154/Hole 925A	this study; base M5b
		Calcidiscus premacintyrei		NN	LRO	LRO	16.378	Leg 154/Hole 925A	this study
	Cibicides 38 (local)	Cibicides opima var. (local)		BF	HO		-		Picou et al. (1999), Part I, Data Sheet 28; tied to LRO C. premacintyrei
M42							16.537	NN Peak/Event
		Eccentricity		Max	CycStr		16.544
		Peak		NN Abun	Inc	Inc	16.537	Leg 154/Hole 925A	this study
		Cyclicargolithus floridanus		NN	HO Acme	Inc	16.537	Leg 154/Hole 925A	this study
		Trilobatus sicanus		PF		LO	16.579	Leg 154/Hole 925A	this study; base N8/M5a
M40							16.802	NN Events
		Eccentricity		Max	CycStr		16.82
		Peak		NN Abun	Inc	Inc	16.818	Leg 154/Hole 928A	this study
		Helicosphaera ampliaperta (>12)		NN	HO	HO	16.802	Leg 154/Hole 928A	Boesiger et al. (2017)
		Helicosphaera ampliaperta		NN	Inc	Inc	16.802	Leg 154/Hole 928A	this study
	Robulus 54B	Lenticulina mayeri var. ("beaded keel")		BF	HO		-		Picou et al. (1999), Part I, Data Sheet 111
		Operculinoides sp.		BF	HO		-		Picou et al. (1999), Part I, Data Sheet 23
		Eponides ornatus		BF	HO		-		Picou et al. (1999), Part I, Data Sheet 46
		Calcidiscus premacintyrei		NN	LO	LO	17.058	Leg 154/Hole 928B	Boesiger et al. (2017)
LM40							17.258	NN Peak/NN & PF Event
		Eccentricity		Max	CycStr		17.299
		Peak		NN Abun	Inc	Inc	17.258	Leg 154/Hole 928B	this study
	Discoaster druggii (stubby)	Discoaster shumnykii		NN	HRO	HRO	17.258	Leg 154/Hole 928B	de Kaenel et al. (2017) - also HO at 17.178Ma in Leg154 (Hole 928B)
		Catapsydrax dissimilis		PF	HO		17.259	Leg 154/Hole 928B	this study; base N7/M4a
		Sphenolithus heteromorphus		NN	LCO	LCO	17.383	Leg 154/Hole 928B	Bergen et al. (2017)
		Eccentricity		Max	CycStr		17.391
		Discoaster exilis		NN	LO	LO	17.393	Leg 154/Hole 928B	Browning et al. (2017)
M35							17.425	NN Peak/Events
		Eccentricity		Max	CycStr		17.463
		Peak		NN Abun	Inc	Inc	17.425	Leg 154/Hole 928B	this study
		Helicosphaera mediterranea		NN	HO	HO	17.425	Leg 154/Hole 928B	Boesiger et al. (2017)
	Sphenolithus cf. procerus (tapered)	Sphenolithus apoxis		NN	HO	Inc	17.425	Leg 154/Hole 928B	Inc/HFO from Bergen et al. (2017); HO 17.347Ma from Leg 154 (Hole 928B) also Bergen et al. (2017)
		Saracenaria senni		BF	HO		-		Picou et al. (1999), Part I, Data Sheet 117
		Saracenaria schencki		BF	HO		-
		Discoaster deflandrei		NN	HO Acme	HO Acme	17.456	Leg 154/Hole 928B	de Kaenel et al. (2017)
		Gyroidina K		BF	HO		-	Leg 154/Hole 928B	Picou et al. (1999), Part I, Data Sheet 89; plotted at 17.517Ma on NN Abundance Increase Leg 154
		Discoaster druggii (>15)		NN	HO	HRO	17.609	Leg 154/Hole 928B	HRO from de Kaenel et al. (2017) - also HO at 17.347Ma in Leg154 (Hole 928B)
		Triquetrorhabdulus carinatus		NN	-	HO	17.652	Leg 154/Hole 928B	this study
		Sphenolithus heteromorphus		NN	LFO	LFO	17.652	Leg 154/Hole 928B	Bergen et al. (2017)
		Sphenolithus belemnos		NN	HO	HO	17.683	Leg 154/Hole 928B	Bergen et al. (2017); base NN4
M30							17.713	NN Peak/Event
		Peak		NN Abun	Inc	Inc	17.713	Leg 154/Hole 928B	this study
		Reticulofenestra spp. (<3)		NN	Flood	Inc	17.713	Leg 154/Hole 928B	this study
	Robulus chambersi	Lenticulina chambersi		BF	HRO		-		Picou et al. (1999), Part I, Data Sheet 115
		Sphenolithus heteromorphus		NN	-	LO	17.791	Leg 154/Hole 928B	Bergen et al. (2017); base CN3 (CNM6)
M25							17.831	NN Event
		Eccentricity		Max	CycStr		17.857
		Peak		NN Abun	Inc	Inc	17.852	Leg 154/Hole 926B	this study
		Sphenolithus belemnos		NN	HRO	HRO	17.831	Leg 154/Hole 928B	Bergen et al. (2017)
	Catapsydrax dissimilis (ROC)	Catapsydrax dissimilis (GoM)		PF	RE		-		BP M25 historical marker; downhole increase at 17.731 in Hole 928B
		Sphenolithus belemnos		NN	Inc	Inc	17.933	Leg 154/Hole 926B	this study; stronger downhole increase at 17.951 (Hole 926B)
		Globigerinoides altiaperturus		PF	HO	HO	-		plotted at HO of questionable G. altiaperturus at 17.893 in Hole 926B
	Discorbis B	Discorbis bolivarensis		BF	HO		-	Leg 154/Hole 926B	Picou et al. (1999), Part I, Data Sheet 43; plotted at 18.053Ma on NN Abundance Increase Leg 154
M20							18.132	NN Peak/Event
		Eccentricity		Max	CycStr		18.17
		Peak		NN Abun	Inc	Inc	18.132	Leg 154/Hole 926C	this study
		Discoaster calculosus s.s.		NN	HO	HO	18.132	Leg 154/Hole 926C	de Kaenel et al. (2017): used ≥15μm
		Marginulina ascensionensis		BF	HO		-		Picou et al. (1999), Part I, Data Sheet 99
		Bolivina tenuistriata (local)		BF	HO		-		Picou et al. (1999), Part I, Data Sheet 17
		Dentoglobigerina binaiensis	Globigerina binaiensis, Globoquadrina binaiensis	PF	HO	HO	-		HO questionable D. binaiensis at 18.292 in Hole 926B; BP M20 historical marker; revised name, Wade et al. (2018)
		"Discorbis B consistent 1"		BF	HO		-		BP Internal; faunal assemblage "in" M20
		"Discorbis B consistent 2"		BF	RE		-		BP Internal; faunal assemblage "in" M20
LM20A							18.612	NN Peak/Events
		Eccentricity		Max	CycStr		18.631
		Peak		NN Abun	Inc	Inc	18.612	Leg 154/Hole 926B	this study
		Sphenolithus procerus		NN	HO	HO	18.612	Leg 154/Hole 926B	Bergen et al. (2017)
		Sphenolithus paratintinnabulum		NN	HO	HO	18.612	Leg 154/Hole 926B	Bergen et al. (2017)
		"Discorbis B consistent 3"		BF	RE		-		BP Internal; faunal assemblage "in" LM20A
		Globigerinatella insueta s.s.		PF		LO	18.694	Leg 154/Hole 925A	this study; base N6
LM20B							18.768	NN Events
		Eccentricity		Max	CycStr		18.721
		Peak		NN Abun	Inc	Inc	18.753	Leg 154/Hole 925A	this study
		Sphenolithus dissimilis		NN	HO	HO	18.768	Leg 154/Hole 926B	Bergen et al. (2017)
		Sphenolithus disbelemnos		NN	HO	HO	18.768	Leg 154/Hole 926B	Bergen et al. (2017)
		Helicosphaera ampliaperta (>12)		NN	LO	LO	18.768	Leg 154/Hole 926B	Boesiger et al. (2017): not well constrained in Leg 154
M15							18.852	NNPeak/NN & PF Event
		Eccentricity		Max	CycStr		18.82
		Peak		NN Abun	Inc	Inc	18.852	Leg 154/Hole 926B	this study
		Discoaster saundersii		NN	HO	HO	18.852	Leg 154/Hole 926B	de Kaenel et al. (2017)
		Trilobatus primordius	Globigerinoides primordius , "Globigerinoides" primordius	PF	HO	HO	18.852	Leg 154/Hole 926B	this study; revised name, Wade et al. (2018)
		Siphonina davisi		BF	HO		-		Picou et al. (1999), Part I, Data Sheet 122
		Eccentricity		Max	CycStr		18.923
LM15							18.991	NN Peak/Event
		Peak		NN Abun	Inc	Inc	18.991	Leg 154/Hole 926B	this study
		Triquetrorhabdulus carinatus		NN	HRO	Inc	18.991	Leg 154/Hole 926B	this study; historical BP GoM Marker is an HO; Leg 154 is a strong downhole increase
	Dictyococcites bisectus filewiczii	"Dictyococcites" filewiczii	Reticulofenestra filewiczii	NN	HO	HO	19.011	Leg 154/Hole 926B	this study
		Planulina palmerae		BF	HO		-		Picou et al. (1999), Part I, Data Sheet 104
M12							19.072	NN Peak/Event
		Eccentricity		Max	CycStr		19.083
		Peak		NN Abun	Inc	Inc	19.072	Leg 154/Hole 926B	this study
	Reticulofenestra lockeri/Dictyococcites excavatus	Dictyococcites albitectus		NN	Inc	Inc	19.072	Leg 154/Hole 926B	this study
		Helicosphaera ampliaperta		NN	LO	LO	19.115	Leg 154/Hole 926B	Boesiger et al. (2017)
M10							19.171	NN Event
		Eccentricity		Max	CycStr		19.18
		Peak		NN Abun	Inc	Inc	19.152	Leg 154/Hole 926B	this study
		Reticulofenestra pseudoumbilicus		NN	LO	LO	19.171	Leg 154/Hole 926B	this study
M8							19.392	NN Peak/Event
		Eccentricity		Max	CycStr		19.368
		Peak		NN Abun	Inc	Inc	19.392	Leg 154/Hole 926C	this study
		Cyclicargolithus floridanus (<6)		NN	Inc	Inc	19.392	Leg 154/Hole 926C	this study
		Sphenolithus belemnos		NN	LO	LO	19.414	Leg 154/Hole 926C	Bergen et al. (2017); base NN3 (CN2 & CNM5)
M5							19.552	NN Peak/Events
		Eccentricity		Max	CycStr		19.554
		Peak		NN Abun	Inc	Inc	19.552	Leg 154/Hole 926B	this study
		Helicosphaera euphratis		NN	HO	HO	19.552	Leg 154/Hole 926B	Boesiger et al. (2017)
		Cyclicargolithus floridanus (<6)		NN	HCO	HCO	19.552	Leg 154/Hole 926B	this study
		Ilselithina fusa		NN	HO	HO	19.712	Leg 154/Hole 926B	Bergen et al. (2017)
LOCAL							19.832	NN Peak/Event
		Eccentricity		Max	CycStr		19.845
		Peak		NN Abun	Inc	Inc	19.832	Leg 154/Hole 926B	this study
		Sphenolithus cometa		NN	HRO	HRO	19.832	Leg 154/Hole 926B	Bergen et al. (2017)
LM5A							20.17	NN Event
		Eccentricity		Max	CycStr		20.144
		Peak		NN Abun	Inc	Inc	20.15	Leg 154/Hole 926C	this study
	Helicosphaera cf. recta	Helicosphaera recta		NN	HO	HO	20.17	Leg 154/Hole 926C	Boesiger et al. (2017)
		Lenticulina hanseni		BF	HO		-		Picou et al. (1999), Part I, Data Sheet 96
		Cyclicargolithus floridanus (>9)		NN	Inc	Inc	20.231	Leg 154/Hole 926B	this study
LM5B							20.291	NN Peak/Event
		Eccentricity		Max	CycStr		20.321
		Peak		NN Abun	Inc	Inc	20.291	Leg 154/Hole 926B	this study
		Sphenolithus conicus (>7)		NN	HO	Inc	20.291	Leg 154/Hole 926B	actual Leg 154 age is 1st downhole increase large forms (Bergen et al., 2017)
		Textularia panamensis		BF	HO		-		Picou et al. (1999), Part I, Data Sheet 137
	Liebusella sp. (local)	Liebusella extans (local)	Liebusella byramensis extans	BF	RE		-		Picou et al. (1999), Part I, Data Sheet 98
		Cyclicargolithus abisectus (>11)		NN	HO	HO	20.35	Leg 154/Hole 926B	this study
LM5C							20.55	NN Peak/Event
		Eccentricity		Max	CycStr		20.531
		Peak		NN Abun	Inc	Inc	20.55	Leg 154/Hole 926B	this study
		Cyclicargolithus abisectus (>12)		NN	HO	HO	20.55	Leg 154/Hole 926B	this study
M4 (O90)							20.67	NN Peak/NN & PF Event
		Eccentricity		Min	CycStr		20.668		Minimum
		Peak		NN Abun	Inc	Inc	20.67	Leg 154/Hole 926B	this study
		Cyclicargolithus abisectus		NN	Inc	Inc	20.67	Leg 154/Hole 926B	this study: use ≥10μm
	Globorotalia kugleri	Paragloborotalia kugleri		PF	HO	HO	20.67	Leg 154/Hole 926B	this study; base N5/M2
		Lenticulina jeffersonensis		BF	HO		-		Picou et al. (1999), Part I, Data Sheet 97
LM4							20.891	NN Peak/Event
		Eccentricity		Max	CycStr		20.913
		Peak		NN Abun	Inc	Inc	20.891	Leg 154/Hole 926B	this study
		Triquetrorhabdulus carinatus		NN	Inc	Inc	20.891	Leg 154/Hole 926B	this study
		Eccentricity		Max	CycStr		20.992
M3A							21.041	NN Peak/Event
		Peak		NN Abun	Inc	Inc	21.041	Leg 154/Hole 926B	this study
	Helicosphaera recta	Helicosphaera truncata		NN	HO	HO	21.041	Leg 154/Hole 926B	Boesiger et al. (2017)
		Ciperoella ciperoensis	Globigerina ciperoensis ciperoensis, "Globigerina" ciperoensis	PF	HO		-		revised name, Wade et al. (2018)
	Globigerina sellii (VR)	Dentoglobigerina sellii	Globoquadrina sellii	PF	HO		-		revised name, Wade et al. (2018)
	Discorbis gravelli	Discorbis gravelli		BF	HO		-		Picou et al. (1999), Part II, Data Sheet 27
M3B							21.161	NN Peak/Events
		Eccentricity		Max	CycStr		21.179
		Peak		NN Abun	Inc	Inc	21.161	Leg 154/Hole 926B	this study
	Helicosphaera cf. compacta	Helicosphaera disrupta		NN	HO	HO	21.161	Leg 154/Hole 926B	Boesiger et al. (2017)
		Clausicoccus fenestratus		NN	HRO	HO	21.161	Leg 154/Hole 926B	this study
LM3A							21.362	NN Peak/Event
		Eccentricity		Max	CycStr		21.363
		Peak		NN Abun	Inc	Inc	21.362	Leg 154/Hole 926B	this study
	Sphenolithus cf. delphix (small)	Sphenolithus microdelphix		NN	HO	HO	21.362	Leg 154/Hole 926B	Bergen et al. (2017)
		Camuralithus pelliculathus		NN	HRO		-		Leg 154 HO 20.998Ma (Boesiger et al., 2017); 1st downhole Inc 21.274Ma in Hole 926B (this study)
	Globigerina sellii (HRO)	Dentoglobigerina sellii	Globoquadrina sellii	PF	HRO	HRO	21.402	Leg 154/Hole 926B	this study
	Heterostegina israelskyi	Heterostegina texana		BF	HO		-		Picou et al. (1999), Part II, Data Sheet 39
LM3B							22.126	NN Peak/Event
		Eccentricity		Max	CycStr		22.123
		Peak		NN Abun	Inc	Inc	22.126	Leg 154/Hole 926B	this study
		Triquetrorhabdulus carinatus		NN	HCO	HCO	22.126	Leg 154/Hole 926B	base CNM3
		Cibicides jeffersonensis		BF	HO		-		Picou et al. (1999), Part II, Data Sheet 17
		Sphenolithus disbelemnos		NN	LO Acme	LO Acme	22.288	Leg 154/Hole 926B	Bergen et al. (2017)
		Sphenolithus disbelemnos		NN	LFO	LIO	22.498	Leg 154/Hole 926B	this study; base CNM2 redefined as lowest increase in species
		Sphenolithus dissimilis		NN	LO	LO	22.658	Leg 154/Hole 926B	Bergen et al. (2017)
		Discoaster druggii (>15)		NN	LO	LO	22.757	Leg 154/Hole 928B	de Kaenel et al. (2017); base NN2 (CN1c)
LM3C							22.998	NN Peak/Events
		Eccentricity		Max	CycStr		22.997
		Peak		NN Abun	Inc	Inc	22.998	Leg 154/Hole 926B	this study
		Sphenolithus capricornutus s.s.		NN	HO	HO	22.998	Leg 154/Hole 926B	Bergen et al. (2017)
		Sphenolithus spp.		NN	Flood	Flood	22.998	Leg 154/Hole 926B	Bergen et al. (2017)
		Discoaster druggii (10-15)		NN	LO	LO	23.038	Leg 154/Hole 926B	Base NN1; Revised age (this study); de Kaenel et al. (2017): 23.030Ma
O85 (M2)							23.072	NN Peak/Event
		Peak		NN Abun	Inc	Max	23.072	Leg 154/Hole 926B	this study
		Sphenolithus delphix		NN	HO	HO	23.072	Leg 154/Hole 926B	Revised age (this study); Bergen et al. (2017): 23.093Ma; base CNM1
		Eccentricity		Max	CycStr		23.084
		Ciperoella angulisuturalis	Globigerina angulisuturalis, "Globigerina" angulisuturalis	PF	HO	HO	-		HO C. aff. angulisuturalis at 23.308 in Hole 926B; revised name, Wade et al. (2018)
		Bolivina perca		BF	HO		-		Picou et al. (1999), Part II, Data Sheet 9
O83 (LM2)							23.253	NN Peak/Event
		Eccentricity		Max	CycStr		23.276
		Peak		NN Abun	Inc	Inc	23.253	Leg 154/Hole 926B	this study
		Sphenolithus conicus (>7)		NN	Inc	Inc	23.253	Leg 154/Hole 926B	Bergen et al. (2017): Leg 154 is increase in large forms ( ≥7µm)
		Sphenolithus disbelemnos		NN	LO	LO	23.274	Leg 154/Hole 926B	Bergen et al. (2017)
	Globorotalia kugleri	Paragloborotalia kugleri		PF	LO	LO	23.395	Leg 154/Hole 926B	this study; base M1a
		Eccentricity		Max	CycStr		23.564
O82							23.594	NN Peak/Event
		Peak		NN Abun	Inc	Inc	23.594	Leg 154/Hole 929A	this study
		Clausicoccus fenestratus		NN	Inc	HFO	23.594	Leg 154/Hole 929A	this study
O80							23.854	NN Event
		Peak		NN Abun	Inc	Inc	23.834	Leg 154/Hole 926B	this study
		Eccentricity		Max	CycStr		23.844
		Cyclicargolithus abisectus		NN	Acme	Max	23.854	Leg 154/Hole 926B	Base CN1b; this study: maximum value in Leg 154 - only age control for GoM O80
		Dictyococcites stavensis		NN	HRO		-
	Reticulofenestra bisecta	Dictyococcites bisectus		NN	Inc		-
		Marginulina idiomorpha		BF	HO		-		Picou et al. (1999), Part II, Data Sheet 43
O79							24.215	NN Peak/Event
		Eccentricity		Max	CycStr		24.212
		Peak		NN Abun	Inc	Inc	24.215	Leg 154/Hole 926B	this study
		Sphenolithus ciperoensis		NN	HO	HO	24.215	Leg 154/Hole 926B	Bergen et al. (2017); base NP26 (CN1a & CNO6)
	Globigerina ciperoensis ciperoensis	Ciperoella ciperoensis	Globigerina ciperoensis, "Globigerina" ciperoensis	PF	HRO	HRO	24.275	Leg 154/Hole 926B	this study
		Sphenolithus capricornutus s.s.		NN	LO	LO	24.281	Leg 154/Hole 926B	Bergen et al. (2017)
		Eccentricity		Max	CycStr		24.3
O78							24.346	PF Event/NN Peak
	Globorotalia opima nana	Paragloborotalia nana		PF	HRO	INC	24.346	Leg 154/Hole 926B	this study
		Marginulina vaginata		BF	HO		-		Picou et al. (1999), Part II, Data Sheet 45
		Peak		NN Abun	Inc	Inc	24.346	Leg 154/Hole 926B	this study
	Sphenolithus distentus var.	Sphenolithus bulbulus		NN	HO	HRO	24.365	Leg 154/Hole 926B	HRO from Bergen et al. (2017); HO in Leg 154 (Hole 926B) is 24.248Ma also Bergen et al. (2017)
		Sphenolithus ciperoensis		NN	Inc	HCO	24.456	Leg 154/Hole 926B	HCO from Bergen et al. (2017)
	Sphenolithus predistentus var./Sphenolithus parviquetrus	Sphenolithus peartiae		NN	HO	HO	24.683	Leg 154/Hole 926B	Bergen et al. (2017)
O77							24.7	NN Peak/Event
		Eccentricity		Max	CycStr		24.704
		Peak		NN Abun	Inc	Max	24.7	Leg 154/Hole 928B	this study
		Sphenolithus triangularis		NN	HO	HO	24.7	Leg 154/Hole 928B	Bergen et al. (2017)
	Globigerina angulisuturalis	Ciperoella angulisuturalis	"Globigerina" angulisuturalis	PF	HRO	INC	24.759	Leg 154/Hole 926B	this study
		Sphenolithus ciperoensis (>6)		NN	HO	HO	24.8	Leg 154/Hole 926B	Bergen et al. (2017)
O75							24.87	NN Peak/Event
		Eccentricity		Max	CycStr		24.876
		Peak		NN Abun	Inc	Inc	24.87	Leg 154/Hole 926B	this study
		Helicosphaera bramlettei		NN	HO	HRO	24.87	Leg 154/Hole 926B	Boesiger et al. (2017)
		Marginulina howei		BF	HO		-		Picou et al. (1999), Part II, Data Sheet 42
	Sphenolithus ciperoensis var./Sphenolithus cathetus	Sphenolithus tawfikii		NN	HO	HO	25.047	Leg 154/Hole 925A	Bergen et al. (2017)
